# Supplementary material for: Predictive models of melanoma metastasis based on dermatoscopy in an international retrospective human reader study
Source: Springer Nature journal article supplement (doi:10.1038/s41467-025-65972-w), 2025-12-08
Supplement: MOESM1 [file 41467_2025_65972_MOESM1_ESM.pdf]

# **Predictive models of melanoma metastasis based on dermatoscopy in an international retrospective human reader study**

## **Supplementary File**

### **Table of Contents**

#### **Supplementary Tables**

**Supplementary Table 1:** Number of lesions evaluated per reader and frequencies of lesions evaluated in non-metastatic and metastatic patients

**Supplementary Table 2:** Interrater agreement on the dermatoscopic criteria of melanoma based on dermatoscopic images (Number of readers=30)

**Supplementary Table 3:** Frequencies of dermatoscopic features in the total cohort and in patients with and without metastasis at diagnosis or during follow up

**Supplementary Table 4:** Results from univariate and multivariate logistic regression for the prediction of melanoma metastasis based on dermatoscopy in the total cohort

**Supplementary Table 5:** Univariate and multivariate logistic regression analysis for the prediction of melanoma metastasis based on clinical and histopathological factors in the total cohort

**Supplementary Table 6:** Models derived from Cox regression analysis for the prediction of RFS and DMFS in patients with stage I-II melanoma

**Supplementary Table 7:** Frequencies of clinical and histopathological characteristics of patients with early-stage melanoma according to training and test set

**Supplementary Table 8:** Frequencies of dermatoscopic criteria of patients with early-stage melanomas according to training and test set

**Supplementary. Table 9:** AUC values for the prediction of RFS and DMFS after applying 5-fold cross validation in training set and independent validation in test set in patients with early-stage melanoma

**Supplementary Table 10:** Multivariable Cox regression for the prediction of RFS and DMFS based on dermatoscopic predictors and AJCC stage in patients with stage I-II melanoma (model 4)

**Supplementary Table 11:** AUC values for the prediction of RFS and DMFS in patients with early-stage melanoma based on model 4

**Supplementary Table 12:** Sensitivity analysis with exclusion of patients with acral and subungual anatomic location and the effect on models 1,2,3 for the prediction of metastasis

**Supplementary Table 13:** Sensitivity analysis with exclusion of patients with acral and subungual anatomic location and the prediction of RFS and DMFS based on model 1,2,3

**Supp. Table 14:** P-value adjustment for multiple comparisons in univariate regression analysis

**Supplementary Table 15:** Frequencies of dermatoscopic features according to metastatic status at diagnosis

**Supplementary Table 16:** Sensitivity analysis for the prediction of metastasis based on Model 1 and after exclusion of patients with metastasis at diagnosis

**Supplementary Table 17:** Sensitivity analysis for the prediction of metastasis based on Model 1 after adjustment for histopathologic subtype of the primary tumor

**Supplementary Table 18:** Subgroup analyses for the prediction of metastasis using model 1 and based on clinically relevant Breslow thickness thresholds in the total cohort

**Supplementary Table 19:** Subgroup analyses for the prediction RFS and DMFS using model 1 and based on clinically relevant Breslow thickness thresholds in patients with early-stage melanomas

**Supplementary Table 20:** Demographic characteristics and institutions of evaluators who participated in lesions evaluation.

**Supplementary Table 21:** Description of dermatoscopic criteria included in the analysis

### **Supplementary Figure**

**Supp. Figure 1:** Example of the questionnaire and the web-based interface for lesion evaluation.

## Supplementary Tables

**Supplementary Table 1: Number of lesions evaluated per reader and frequencies of lesions evaluated in non-metastatic and metastatic patients**

| Reader | Lesions evaluated (n) | Non-metastatic (n, %) | Metastatic (n,%) |
|--------|-----------------------|-----------------------|------------------|
| 1      | 130                   | 64 (49.2)             | 66 (50.8)        |
| 2      | 21                    | 12 (57.1)             | 9 (42.9)         |
| 3      | 105                   | 54 (51.4)             | 51 (48.6)        |
| 4      | 103                   | 63 (61.2)             | 40 (38.8)        |
| 5      | 208                   | 113 (54.3)            | 95 (45.7)        |
| 6      | 99                    | 59 (59.6)             | 40 (40.4)        |
| 7      | 176                   | 99 (56.3)             | 77 (43.8)        |
| 8      | 102                   | 53 (52)               | 49 (48)          |
| 9      | 110                   | 61 (55.5)             | 49 (44.5)        |
| 10     | 102                   | 63 (61.8)             | 39 (38.2)        |
| 11     | 105                   | 56 (53.3)             | 49 (46.7)        |
| 12     | 102                   | 55 (53.9)             | 47 (46.1)        |
| 13     | 101                   | 55 (54.5)             | 46 (45.5)        |
| 14     | 105                   | 59 (56.2)             | 46 (43.8)        |
| 15     | 123                   | 67 (54.5)             | 56 (45.5)        |
| 16     | 120                   | 61 (50.8)             | 59 (49.2)        |
| 17     | 104                   | 57 (54.8)             | 47 (45.2)        |
| 18     | 104                   | 58 (55.8)             | 46 (44.2)        |
| 19     | 110                   | 64 (58.2)             | 46 (41.8)        |
| 20     | 134                   | 75 (56)               | 59 (44)          |
| 21     | 112                   | 55 (49.1)             | 57 (50.9)        |
| 22     | 104                   | 59 (58.7)             | 45 (43.3)        |
| 23     | 102                   | 49 (48)               | 53 (52)          |
| 24     | 100                   | 54 (54)               | 46 (46)          |
| 25     | 40                    | 24 (60)               | 16 (40)          |
| 26     | 104                   | 61 (58.7)             | 43 (41.3)        |
| 27     | 102                   | 55 (53.9)             | 47 (46.1)        |
| 28     | 113                   | 56 (49.6)             | 57 (50.7)        |
| 29     | 190                   | 95 (50)               | 95 (50)          |
| 30     | 101                   | 56 (55.4)             | 45 (44.6)        |

n: number of lesions evaluated

**Supplementary Table 2: Interrater agreement on the dermatoscopic criteria of melanoma based on dermatoscopic images (Number of readers=30)**

| <b>Structure</b>      | <b>Krippendorf alpha<br/>(95%CI)</b> | <b>Interpretation*</b> |
|-----------------------|--------------------------------------|------------------------|
| Pigmentation          | 0.577 (0.491 – 0.604)                | Moderate               |
| Brown color           | 0.325 (0.244 – 0.405)                | Fair                   |
| Blue/gray color       | 0.355 (0.274 – 0.435)                | Fair                   |
| Red color             | 0.363 (0.283 – 0.442)                | Fair                   |
| White color           | 0.204 (0.120 – 0.287)                | Fair                   |
| Black color           | 0.416 (0.338 – 0.493)                | Moderate               |
| Ulceration            | 0.579 (0.509 – 0.648)                | Moderate               |
| Regression structures | 0.245 (0.161 – 0.328)                | Fair                   |
| White shiny streaks   | 0.392 (0.313 – 0.470)                | Fair                   |
| Blue-white veil       | 0.389 (0.310 – 0.467)                | Fair                   |
| Eccentric blotch      | 0.203 (0.119 – 0.286)                | Fair                   |
| Angulated lines       | 0.262 (0.08 – 0.342)                 | Fair                   |
| Parallel ridge        | 0.455 (0.378 – 0.531)                | Moderate               |
| Vessels               | 0.559 (0.488 – 0.629)                | Moderate               |

CI: confidence interval

\*Interpretation of Krippendorf alpha was based on Landis and Koch classification

**Supplementary Table 3: Frequencies of dermoscopic features in the total cohort and in patients with and without metastasis at diagnosis or during follow up**

|                                 | Total (N=524) | Non-metastatic (N=302) | Metastatic (N=222) | X <sup>2</sup> -test (p-value) |
|---------------------------------|---------------|------------------------|--------------------|--------------------------------|
| Pigmentation (n, %)             |               |                        |                    | <0.001                         |
| Absent                          | 42 (8)        | 15 (5)                 | 27 (12.2)          |                                |
| 25                              | 95 (18.1)     | 29 (9.6)               | 66 (29.7)          |                                |
| 50                              | 91 (17.4)     | 36 (11.9)              | 55 (24.8)          |                                |
| 75                              | 121 (23.1)    | 86 (28.5)              | 35 (15.8)          |                                |
| 100                             | 175 (33.4)    | 136 (45)               | 39 (17.6)          |                                |
| Colors (n, %)                   |               |                        |                    |                                |
| Brown                           | 433 (82.6)    | 269 (89.1)             | 164 (73.9)         | <0.001                         |
| Blue/gray                       | 329 (62.8)    | 175 (57.9)             | 154 (69.4)         | 0.008                          |
| Red                             | 311 (59.4)    | 146 (48.3)             | 165 (74.3)         | <0.001                         |
| White                           | 302 (57.6)    | 149 (49.3)             | 153 (68.9)         | <0.001                         |
| Black                           | 247 (47.1)    | 155 (51.3)             | 92 (41.1)          | 0.025                          |
| Dermatoscopic ulceration (n, %) |               |                        |                    | <0.001                         |
| Absent                          | 352 (67.2)    | 238 (78.8)             | 114 (51.4)         |                                |
| 1-49                            | 106 (20.2)    | 51 (16.9)              | 55 (24.8)          |                                |
| >50                             | 66 (12.6)     | 13 (4.3)               | 53 (23.9)          |                                |
| Regression structures (n, %)    |               |                        |                    | 0.036                          |
| Absent                          | 353 (67.4)    | 192 (63.6)             | 161 (72.5)         |                                |
| 1-49                            | 120 (22.9)    | 73 (24.2)              | 47 (21.2)          |                                |
| >50                             | 51 (9.7)      | 37 (12.3)              | 14 (6.3)           |                                |
| White shiny streaks (n, %)      | 285 (54.4)    | 151 (50)               | 134 (60.4)         | 0.019                          |
| Blue-white veil (n, %)          | 269 (51.3)    | 127 (42.1)             | 142 (64)           | <0.001                         |
| Eccentric blotch (n, %)         | 201 (38.4)    | 108 (35.8)             | 93 (41.9)          | 0.154                          |
| Angulated lines (n, %)          | 23 (4.4)      | 12 (4)                 | 11 (5)             | 0.588                          |
| Parallel ridge (n, %)           | 20 (3.8)      | 8 (2.6)                | 12 (5.4)           | 0.104                          |
| Vessels (n, %)                  |               |                        |                    | <0.001                         |
| Absent                          | 223 (42.6)    | 157 (52)               | 66 (29.7)          |                                |
| 1-49                            | 154 (29.4)    | 83 (27.5)              | 71 (32)            |                                |
| >50                             | 147 (28.1)    | 62 (20.5)              | 85 (38.3)          |                                |
| Type of vessels (n, %)          |               |                        |                    | <0.001                         |
| Dotted/Coiled                   | 78 (14.9)     | 54 (17.9)              | 24 (10.8)          |                                |
| Linear/Irregular                | 120 (22.9)    | 61 (20.2)              | 59 (26.6)          |                                |
| Two types of vessels            | 103 (19.6)    | 30 (9.9)               | 73 (32.9)          |                                |

N: number of patients. Pigmentation, dermatoscopic ulceration, regression structures, vessels are expressed as percentages of feature extent in the lesion. Two-sided p-values for categorical variables were obtained from the Pearson's chi-squared test. Exact p-values are provided for pigmentation ( $p=6.06 \times 10^{-18}$ ), brown ( $p=5.67 \times 10^{-6}$ ), red ( $p=2.19 \times 10^{-9}$ ) and white color ( $p=7.38 \times 10^{-6}$ ), dermatoscopic ulceration ( $p=3.81 \times 10^{-13}$ ), blue-white veil ( $p=7.10 \times 10^{-7}$ ), vessels ( $p=2.83 \times 10^{-7}$ ) and type of vessels ( $p=4.66 \times 10^{-7}$ ).

**Supplementary Table 4: Results from univariate and multivariate logistic regression for the prediction of melanoma metastasis based on dermatoscopy in the total cohort**

|                                 | Univariate |         |              | Multivariate |         |              |
|---------------------------------|------------|---------|--------------|--------------|---------|--------------|
|                                 | OR         | p-value | 95%CI        | OR           | p-value | 95%CI        |
| <b>Pigmentation</b>             |            |         |              |              |         |              |
| Absent                          | Ref.       |         |              | Ref.         |         |              |
| 25                              | 1.26       | 0.54    | 0.58 – 2.72  | 1.07         | 0.79    | 0.45 – 2.54  |
| 50                              | 0.84       | 0.67    | 0.39 – 1.81  | 0.50         | 0.05    | 0.20 – 1.22  |
| 75                              | 0.22       | <0.001  | 0.10 – 0.47  | 0.14         | <0.001  | 0.05 – 0.33  |
| 100                             | 0.16       | <0.001  | 0.07 – 0.32  | 0.07         | <0.001  | 0.03 – 0.18  |
| <b>Colors</b>                   |            |         |              |              |         |              |
| Brown                           | 0.34       | <0.001  | 0.21 – 0.55  |              |         |              |
| Blue/gray                       | 1.64       | 0.008   | 1.14 – 2.37  |              |         |              |
| Red                             | 3.09       | <0.001  | 2.12 – 4.50  |              |         |              |
| White                           | 2.27       | <0.001  | 1.58 – 3.27  |              |         |              |
| Black                           | 0.67       | 0.025   | 0.47 – 0.95  |              |         |              |
| <b>Dermatoscopic ulceration</b> |            |         |              |              |         |              |
| Absent                          | Ref.       |         |              | Ref.         |         |              |
| 1-49                            | 2.25       | <0.001  | 1.44 – 3.50  | 1.46         | 0.14    | 0.87 – 2.42  |
| >50                             | 8.51       | <0.001  | 4.59 – 16.24 | 3.45         | 0.001   | 1.63 – 7.69  |
| <b>Regression structures</b>    |            |         |              |              |         |              |
| Absent                          | Ref.       |         |              | Ref.         |         |              |
| 1-49                            | 0.77       | 0.22    | 0.50 – 1.17  | 0.75         | 0.30    | 0.44 – 1.27  |
| >50                             | 0.45       | 0.016   | 0.23 – 0.86  | 0.42         | 0.026   | 0.19 – 0.89  |
| White shiny streaks             | 1.52       | 0.019   | 1.07 – 2.16  |              |         |              |
| Blue-white veil                 | 2.44       | <0.001  | 1.71 – 3.49  | 6.43         | <0.001  | 3.87 – 11.06 |
| Eccentric blotch                | 1.29       | 0.154   | 0.90 – 1.84  |              |         |              |
| Angulated lines                 | 1.26       | 0.589   | 0.54 – 2.91  |              |         |              |
| Parallel ridge                  | 2.10       | 0.111   | 0.84 – 5.22  |              |         |              |
| <b>Vessels</b>                  |            |         |              |              |         |              |
| Absent                          | Ref.       |         |              |              |         |              |
| 1-49                            | 2.03       | <0.001  | 1.32 – 3.12  |              |         |              |
| >50                             | 3.26       | <0.001  | 2.10 – 5.04  |              |         |              |
| <b>Type of vessels</b>          |            |         |              |              |         |              |
| One type                        | 1.56       | 0.03    | 1.04 – 2.34  |              |         |              |
| Two types of vessels            | 6.44       | <0.001  | 3.83 – 10.82 |              |         |              |

OR: Odds ratio, CI: confidence interval, Ref.: Reference level. 524 patients analyzed. Pigmentation, dermatoscopic ulceration, regression structures, vessels are expressed as percentages of feature extent in the lesion. Variables included in multivariate model: brown, blue/gray, red, white, black color, pigmentation, derm. ulceration, regression structures, white shiny streaks, blue-white veil, vessels. Variables included in last step of multivariable analysis after applying backward elimination are presented. Multivariable model was adjusted for age, sex, anatomic location. Two-sided p-values were obtained from Wald tests. Exact p-values – univariate: pigmentation 75% (p=0.0001), pigmentation 100% (p=2.28 x 10<sup>-6</sup>), brown (p=1.12 x 10<sup>-5</sup>), red (p=4.21 x 10<sup>-9</sup>) and white color (p=9.96 x 10<sup>-6</sup>), derm. ulceration 1-49 (p=3.0 x 10<sup>-4</sup>) and >50

( $p=3.08 \times 10^{-11}$ ), blue-white veil ( $p=9.52 \times 10^{-7}$ ), vessels 1-49 ( $p=0.0013$ ), vessels >50 ( $p=1.22 \times 10^{-7}$ ), two types of vessels ( $p=2.06 \times 10^{-12}$ ). Exact p-values – multivariable: pigmentation 75% ( $p=1.35 \times 10^{-5}$ ), pigmentation 100% ( $p=1.77 \times 10^{-8}$ ) and blue-white veil ( $p=3.21 \times 10^{-12}$ ), Adjustment for multiple comparisons for the univariate analysis is available in Supp. Table 14.

**Supplementary Table 5: Univariate and multivariate logistic regression analysis for the prediction of melanoma metastasis based on clinical and histopathological factors in the total cohort**

|                                      | Univariate |         |              | Multivariate |         |              |
|--------------------------------------|------------|---------|--------------|--------------|---------|--------------|
|                                      | OR         | p-value | 95%CI        | OR           | p-value | 95%CI        |
| Age (continuous)                     | 1.01       | 0.01    | 1.01 – 1.024 |              |         |              |
| Sex                                  |            |         |              |              |         |              |
| Male                                 | Ref.       |         |              |              |         |              |
| Female                               | 0.90       | 0.58    | 0.64 – 1.28  |              |         |              |
| Anatomic location                    |            |         |              |              |         |              |
| Head and neck                        | 1.20       | 0.49    | 0.71 – 2.02  |              |         |              |
| Trunk                                | Ref.       |         |              |              |         |              |
| UE                                   | 0.93       | 0.82    | 0.53 – 1.65  |              |         |              |
| LE                                   | 0.77       | 0.32    | 0.47 – 1.28  |              |         |              |
| Acral                                | 1.19       | 0.79    | 0.31 – 4.59  |              |         |              |
| Subungual                            | Inf.       |         |              |              |         |              |
| Breslow thickness (continuous)       | 1.53       | <0.001  | 1.37 – 1.70  | 1.32         | <0.001  | 1.17 – 1.43  |
| Histopathologic ulceration (present) | 4.95       | <0.001  | 3.34 – 7.33  | 2.30         | <0.001  | 1.41 – 3.74  |
| Mitosis (n=444)                      |            |         |              |              |         |              |
| Absent                               | Ref.       |         |              |              |         |              |
| 1-5/mm <sup>2</sup>                  | 4.21       | <0.001  | 1.98 – 8.90  | 2.64         | 0.014   | 1.21 – 5.74  |
| >5/mm <sup>2</sup>                   | 15.48      | <0.001  | 7.10 – 33.74 | 4.64         | <0.001  | 1.97 – 10.91 |

OR: Odds ratio, CI: confidence interval, Ref.: Reference level, Inf.: infinitive, UE: upper extremities, LE: lower extremities. 524 patients analyzed. Two-sided p-values were obtained from Wald tests. Exact p-value – univariate: Breslow thickness ( $p=1.12 \times 10^{-14}$ ), histopathologic ulceration ( $p=1.55 \times 10^{-15}$ ), mitosis 1-5/mm<sup>2</sup> ( $p=1.77 \times 10^{-4}$ ) and mitosis >5/mm<sup>2</sup> ( $p=5.57 \times 10^{-12}$ ). Exact p-value – multivariable: Breslow thickness ( $p=5.58 \times 10^{-8}$ ), histopathologic ulceration ( $p=8.17 \times 10^{-4}$ ) and mitosis >5/mm<sup>2</sup> ( $p=4.40 \times 10^{-4}$ ). Adjustment for multiple comparisons was not applied.

**Supplementary Table 6: Models derived from Cox regression analysis for the prediction of RFS and DMFS in patients with stage I-II melanoma**

| <b>Recurrence-Free Survival (RFS)</b>          |                     |                     |                     |
|------------------------------------------------|---------------------|---------------------|---------------------|
|                                                | Model 1 (HR, 95%CI) | Model 2 (HR, 95%CI) | Model 3 (HR, 95%CI) |
| <b>Pigmentation</b>                            |                     |                     |                     |
| Absent                                         | Ref.                | -                   | Ref.                |
| 25                                             | 0.82 (0.34 – 1.98)  | -                   | 0.89 (0.36 – 2.15)  |
| 50                                             | 0.51 (0.20 – 1.32)  | -                   | 0.58 (0.23 – 1.53)  |
| 75                                             | 0.40 (0.15 – 1.04)  | -                   | 0.54 (0.21 – 1.42)  |
| 100                                            | 0.15 (0.05 – 0.40)  | -                   | 0.18 (0.06 – 0.50)  |
| <b>Dermatoscopic ulceration</b>                |                     |                     |                     |
| Absent                                         | Ref.                | -                   | Ref.                |
| 1-49                                           | 1.42 (0.83 – 2.45)  | -                   | 1.23 (0.70 – 2.17)  |
| >50                                            | 2.99 (1.47 – 6.04)  | -                   | 2.23 (1.05 – 4.72)  |
| <b>Regression structures</b>                   |                     |                     |                     |
| Absent                                         | Ref.                | -                   | Ref.                |
| 1-49                                           | 0.64 (0.36 – 1.15)  | -                   | 0.69 (0.38 – 1.24)  |
| >50                                            | 0.38 (0.14 – 0.97)  | -                   | 0.35 (0.13 – 0.93)  |
| Blue-white veil                                | 4.37 (2.43 – 7.87)  | -                   | 4.19 (2.30 – 7.61)  |
| Breslow thickness (Cont.)                      | -                   | 1.10 (1.05 – 1.15)  | 1.09 (1.04 – 1.14)  |
| Histopathologic ulceration (Present)           | -                   | 2.32 (1.43 – 3.78)  | 1.55 (0.90 – 2.68)  |
| <b>Distant metastasis-free Survival (DMFS)</b> |                     |                     |                     |
|                                                | Model 1 (HR, 95%CI) | Model 2 (HR, 95%CI) | Model 3 (HR, 95%CI) |
| <b>Pigmentation</b>                            |                     |                     |                     |
| Absent                                         | Ref.                | -                   | Ref.                |
| 25                                             | 0.75 (0.26 – 2.09)  | -                   | 0.82 (0.29 – 2.31)  |
| 50                                             | 0.58 (0.21 – 1.68)  | -                   | 0.67 (0.23 – 1.98)  |
| 75                                             | 0.39 (0.13 – 1.15)  | -                   | 0.57 (0.19 – 1.69)  |
| 100                                            | 0.16 (0.05 – 0.48)  | -                   | 0.21 (0.05 – 0.63)  |
| <b>Dermatoscopic ulceration</b>                |                     |                     |                     |
| Absent                                         | Ref.                | -                   | Ref.                |
| 1-49                                           | 1.51 (0.84 – 2.71)  | -                   | 1.33 (0.72 – 2.47)  |
| >50                                            | 2.69 (1.09 – 6.62)  | -                   | 1.98 (0.76 – 5.11)  |
| <b>Regression structures</b>                   |                     |                     |                     |
| Absent                                         | Ref.                | -                   | Ref.                |
| 1-49                                           | 0.65 (0.34 – 1.25)  | -                   | 0.63 (0.32 – 1.24)  |
| >50                                            | 0.25 (0.07 – 0.81)  | -                   | 0.22 (0.06 – 0.77)  |
| Blue-white veil                                | 4.27 (2.23 – 8.17)  | -                   | 3.97 (2.05 – 7.67)  |
| Breslow thickness (Cont.)                      | -                   | 1.10 (1.05 – 1.15)  | 1.09 (1.04 – 1.15)  |
| Histopathologic ulceration (Present)           | -                   | 2.48 (1.43 – 4.29)  | 1.68 (0.90 – 3.12)  |

HR: Hazard ratio, CI: confidence interval, Ref.: Reference level, RFS: recurrence-free survival, DMFS: distant metastasis free survival, n.s: not significant, Cont.: continuous. 381 patients with early-stage melanoma analyzed. Breslow thickness was included as a continuous variable, histopathologic ulceration and blue-white veil as binary variables (present vs absent). Pigmentation, dermatoscopic ulceration, regression structures, vessels are expressed as percentages of feature extent in the lesion. Variables included in model 1: brown, red, white color, pigmentation, dermatoscopic ulceration, regression structures, angulated lines, blue-white veil, vessels. Significant variables included in last step of backward elimination are presented. Variables included in model 2: Breslow thickness, histopathologic ulceration. Variables included in model 3: Breslow thickness, histopathologic ulceration, pigmentation, dermatoscopic ulceration, regression structures, blue-white veil. All models were adjusted for age, sex and anatomic location.

**Supplementary Table 7: Frequencies of clinical and histopathological characteristics of patients with early-stage melanoma according to training and test set**

|                                         | Total sample<br>(N=381) | Train set<br>(N=306) | Test set<br>(N=75) | p-value |
|-----------------------------------------|-------------------------|----------------------|--------------------|---------|
| Follow-up time (median, range) (months) | 60 (37 – 83)            | 60 (37 – 79.5)       | 58 (39.5 - 86)     | 0.716   |
| Events (n, %)                           |                         |                      |                    |         |
| Metastasis                              | 79 (20.7)               | 66 (21.6)            | 13 (17.3)          | 0.417   |
| Distant metastasis                      | 63 (17.3)               | 51 (17.5)            | 12 (16.2)          | 0.799   |
| Stage at diagnosis (n, %)               |                         |                      |                    | 0.410   |
| IB                                      | 227 (59.6)              | 181(59.1)            | 46 (61.3)          |         |
| IIA                                     | 66 (17.3)               | 55 (18)              | 11 (14.7)          |         |
| IIB                                     | 53 (13.9)               | 45 (14.7)            | 8 (10.7)           |         |
| IIC                                     | 35 (9.2)                | 25 (8.2)             | 10 (13.3)          |         |
| Age (mean, SD)                          | 61.9 (16.9)             | 62.2 (17)            | 60.6 (16.7)        | 0.348   |
| Sex (n, %)                              |                         |                      |                    | 0.613   |
| Male                                    | 203 (53.3)              | 165 (53.9)           | 38 (50.7)          |         |
| Female                                  | 178 (46.7)              | 141 (46.1)           | 37 (49.3)          |         |
| Anatomic location (n, %)                |                         |                      |                    | 0.725   |
| Head and neck                           | 69 (18.1)               | 53 (17.3)            | 16 (21.3)          |         |
| Trunk                                   | 127 (33.4)              | 99 (32.4)            | 28 (37.8)          |         |
| UE                                      | 59 (15.5)               | 49 (16)              | 10 (13.5)          |         |
| LE                                      | 85 (22.4)               | 72 (23.5)            | 13 (17.6)          |         |
| Acral                                   | 38 (10)                 | 30 (9.8)             | 8 (10.8)           |         |
| Subungual                               | 3 (0.8)                 | 3 (1.0)              | -                  |         |
| Breslow thickness (mean, SD)            | 2.55 (3.4)              | 2.5 (2.8)            | 2.7 (3.62)         | 0.308   |
| Histopathologic ulceration (n, %)       | 96 (25.5)               | 78 (25.7)            | 18 (24.3)          | 0.802   |
| Mitosis (n, %)                          |                         |                      |                    | 0.794   |
| Absent                                  | 67 (21.5)               | 51 (20.7)            | 16 (24.6)          |         |
| 1-5/mm <sup>2</sup>                     | 160 (51.4)              | 128 (52)             | 32 (49.2)          |         |
| >5/mm <sup>2</sup>                      | 84 (27)                 | 67 (27.2)            | 17 (26.2)          |         |

N: number of patients, IQR: interquartile range, SD: standard deviation, UE: upper extremities, LE: lower extremities, n: number of patients included in the variable, SLNB: sentinel lymph node biopsy, CLND: complete lymph node dissection. Two-sided p values for continuous variables were obtained from the Mann-Whitney U test, as appropriate. Two-sided p-values for categorical variables were obtained from the Pearson's chi-squared test.

**Supplementary Table 8: Frequencies of dermatoscopic criteria of patients with early-stage melanomas according to training and test set**

|                                 | Total sample<br>(N=381) | Train set<br>(N=306) | Test set<br>(N=75) | p-value |
|---------------------------------|-------------------------|----------------------|--------------------|---------|
| Pigmentation (n, %)             |                         |                      |                    | 0.865   |
| Absent                          | 25 (6.6)                | 20 (6.5)             | 5 (6.7)            |         |
| 25                              | 46 (12.1)               | 37 (12.1)            | 9 (12)             |         |
| 50                              | 56 (14.7)               | 44 (14.4)            | 12 (16)            |         |
| 75                              | 102 (26.8)              | 79 (25.8)            | 23 (30.7)          |         |
| 100                             | 152 (39.9)              | 126 (41.2)           | 26 (34.7)          |         |
| Colors (n, %)                   |                         |                      |                    |         |
| Brown                           | 326 (85.6)              | 261 (85.3)           | 65 (86.7)          | 0.762   |
| Blue/gray                       | 229 (60.1)              | 184 (60.1)           | 45 (60)            | 0.983   |
| Red                             | 204 (53.5)              | 162 (52.9)           | 42 (56)            | 0.634   |
| White                           | 203 (53.3)              | 162 (52.9)           | 41 (54.7)          | 0.788   |
| Black                           | 184 (48.3)              | 151 (49.3)           | 33 (44)            | 0.406   |
| Dermatoscopic ulceration (n, %) |                         |                      |                    | 0.839   |
| Absent                          | 281 (73.8)              | 224 (73.2)           | 57 (76)            |         |
| 1-49                            | 70 (18.4)               | 58 (19)              | 12 (16)            |         |
| >50                             | 30 (7.9)                | 24 (7.8)             | 6 (8)              |         |
| Regression structures (n, %)    |                         |                      |                    | 0.728   |
| Absent                          | 249 (65.4)              | 201 (65.7)           | 48 (64)            |         |
| 1-49                            | 90 (23.6)               | 70 (22.9)            | 20 (26.7)          |         |
| >50                             | 42 (11)                 | 35 (11.4)            | 7 (9.3)            |         |
| White shiny streaks (n, %)      | 196 (51.4)              | 166 (54.2)           | 30 (40)            | 0.04    |
| Blue-white veil (n, %)          | 179 (47)                | 150 (49)             | 29 (38.7)          | 0.105   |
| Eccentric blotch (n, %)         | 140 (36.7)              | 115 (37.6)           | 25 (33.3)          | 0.494   |
| Angulated lines (n, %)          | 18 (4.7)                | 14 (4.6)             | 4 (5.3)            | 0.782   |
| Parallel ridge (n, %)           | 12 (3.1)                | 9 (2.9)              | 3 (4)              | 0.638   |
| Vessels (n, %)                  |                         |                      |                    | 0.349   |
| Absent                          | 181 (47.5)              | 145 (47.4)           | 36 (48)            |         |
| 1-49                            | 108 (28.3)              | 91 (29.7)            | 17 (22.7)          |         |
| >50                             | 92 (24.1)               | 70 (22.9)            | 22 (29.3)          |         |

N: number of patients, IQR: interquartile range, SD: standard deviation, UE: upper extremities, LE: lower extremities, n: number of patients included in the variable, SLNB: sentinel lymph node biopsy, CLND: complete lymph node dissection. Pigmentation, dermatoscopic ulceration, regression structures, vessels are expressed as percentages of feature extent in the lesion. Two-sided p-values for categorical variables were obtained from the Pearson's chi-squared test.

**Supplementary Table 9: AUC values for the prediction of RFS and DMFS after applying 5-fold cross validation in training set and independent validation in test set in early-stage patients with melanoma**

|                      | <b>Model 1</b>                                 | <b>Model 2</b>              | <b>Model 3</b>              |
|----------------------|------------------------------------------------|-----------------------------|-----------------------------|
|                      | <b>Recurrence-Free Survival (RFS)</b>          |                             |                             |
| <b>Training set</b>  |                                                |                             |                             |
| Fold 1               | 0.745 (0.548 – 0.943)                          | 0.636 (0.414 – 0.859)       | 0.752 (0.549 – 0.954)       |
| Fold 2               | 0.717 (0.537 – 0.898)                          | 0.726 (0.547 – 0.905)       | 0.779 (0.602 – 0.956)       |
| Fold 3               | 0.926 (0.826 – 0.989)                          | 0.902 (0.788 – 0.989)       | 0.941 (0.847 – 0.989)       |
| Fold 4               | 0.756 (0.598 – 0.914)                          | 0.709 (0.539 – 0.879)       | 0.776 (0.625 – 0.928)       |
| Fold 5               | 0.828 (0.693 – 0.963)                          | 0.709 (0.502 – 0.916)       | 0.824 (0.679 – 0.969)       |
| Average from 5 folds | 0.795 (0.721 – 0.868)                          | 0.736 (0.650 – 0.823)       | 0.814 (0.764 – 0.892)       |
| DeLong's test        | <i>p</i> >0.05 (vs Model 2)                    | <i>p</i> >0.05 (vs Model 3) | <i>p</i> >0.05 (vs Model 1) |
| <b>Test set</b>      |                                                |                             |                             |
|                      | 0.901 (0.811 – 0.971)                          | 0.865 (0.734 – 0.947)       | 0.923 (0.823 – 0.975)       |
| DeLong's test        | <i>p</i> >0.05 (vs Model 2)                    | <i>p</i> >0.05 (vs Model 3) | <i>p</i> >0.05 (vs Model 1) |
|                      | <b>Distant metastasis-free Survival (DMFS)</b> |                             |                             |
| <b>Training set</b>  |                                                |                             |                             |
| Fold 1               | 0.775 (0.536 – 0.989)                          | 0.583 (0.328 – 0.838)       | 0.775 (0.532 – 0.988)       |
| Fold 2               | 0.663 (0.439 – 0.887)                          | 0.785 (0.611 – 0.959)       | 0.783 (0.584 – 0.982)       |
| Fold 3               | 0.888 (0.75 – 0.988)                           | 0.859 (0.712 – 0.988)       | 0.894 (0.775 – 0.987)       |
| Fold 4               | 0.762 (0.593 – 0.932)                          | 0.725 (0.534 – 0.916)       | 0.788 (0.623 – 0.952)       |
| Fold 5               | 0.835 (0.704 – 0.967)                          | 0.720 (0.528 – 0.912)       | 0.866 (0.645 – 0.987)       |
| Average from 5 folds | 0.785 (0.711 – 0.859)                          | 0.735 (0.646 – 0.823)       | 0.821 (0.773 – 0.899)       |
| DeLong's test        | <i>p</i> >0.05 (vs Model 2)                    | <i>p</i> >0.05 (vs Model 3) | <i>p</i> >0.05 (vs Model 1) |
| <b>Test set</b>      |                                                |                             |                             |
|                      | 0.860 (0.762 – 0.945)                          | 0.810 (0.699 – 0.952)       | 0.869 (0.752 – 0.986)       |
| DeLong's test        | <i>p</i> >0.05 (vs Model 2)                    | <i>p</i> >0.05 (vs Model 3) | <i>p</i> >0.05 (vs Model 1) |

AUC: area under curve, CI: confidence interval. Two-sided p-values derived from DeLong's test for the comparison of AUC values for training and test set.

**Supplementary Table 10: Multivariable Cox regression for the prediction of RFS and DMFS based on dermatoscopic predictors and AJCC stage in patients with stage I-II melanoma (model 4)**

|                                            | RFS [HR (95%CI)]   | DMFS [HR (95%CI)]   |
|--------------------------------------------|--------------------|---------------------|
|                                            | Multivariate       | Multivariate        |
| <b>Pigmentation</b>                        |                    |                     |
| Absent                                     | Ref.               | Ref.                |
| 25                                         | 0.87 (0.36 – 2.10) | 0.79 (0.28 – 2.23)  |
| 50                                         | 0.63 (0.24 – 1.61) | 0.73 (0.25 – 2.11)  |
| 75                                         | 0.52 (0.19 – 1.35) | 0.55 (0.18 – 1.64)  |
| 100                                        | 0.19 (0.07 – 0.53) | 0.22 (0.06 – 0.68)  |
| <b>Dermatoscopic ulceration</b>            |                    |                     |
| <i>Absent</i>                              | Ref.               | Ref.                |
| 1-49                                       | 1.05 (0.59 – 1.89) | 1.03 (0.54 – 1.94)  |
| >50                                        | 1.95 (0.92 – 4.11) | 1.49 (0.59 – 3.75)  |
| <b>Regression structures</b>               |                    |                     |
| <i>Absent</i>                              | Ref.               | Ref.                |
| 1-49                                       | 0.69 (0.38 – 1.26) | 0.69 (0.35 – 1.34)  |
| >50                                        | 0.38 (0.14 – 0.99) | 0.25 (0.07 – 0.83)  |
| Blue-white veil                            | 4.38 (2.42 – 7.92) | 4.19 (2.16 – 8.12)  |
| <b>AJCC Stage (8<sup>th</sup> edition)</b> |                    |                     |
| <i>IB</i>                                  | Ref.               | Ref.                |
| <i>IIA</i>                                 | 1.85 (0.92 – 3.71) | 2.33 (1.08 – 5.02)  |
| <i>IIB</i>                                 | 1.87 (0.94 – 3.73) | 2.40 (1.09 – 5.29)  |
| <i>IIC</i>                                 | 3.39 (1.62 – 7.06) | 4.71 (2.11 – 10.53) |

HR: Hazard ratio, CI: confidence interval, Ref.: Reference level, RFS: recurrence-free survival, DMFS: distant metastasis-free survival, n.s: not significant. Pigmentation, dermatoscopic ulceration and regression structures, are expressed as percentages of feature extent in the lesion. Variables included in model 4: pigmentation, dermatoscopic ulceration, regression structures, blue-white veil, AJCC stage (4 categories). Model 4 was adjusted for age, sex and anatomic location.

**Supplementary Table 11: AUC values with 95%CI for the prediction of RFS and DMFS in patients with early-stage melanoma based on model 4**

|                      | RFS                   | DMFS                  |
|----------------------|-----------------------|-----------------------|
| Training set         |                       |                       |
| Fold 1               | 0.745 (0.544 – 0.947) | 0.742 (0.497 – 0.987) |
| Fold 2               | 0.674 (0.471 – 0.877) | 0.663 (0.429 – 0.897) |
| Fold 3               | 0.912 (0.787 – 0.987) | 0.882 (0.745 – 0.989) |
| Fold 4               | 0.738 (0.574 – 0.902) | 0.754 (0.580 – 0.928) |
| Fold 5               | 0.851 (0.712 – 0.989) | 0.874 (0.759 – 0.989) |
| Average from 5 folds | 0.784 (0.70 – 0.868)  | 0.783 (0.701 – 0.865) |
| Test set             | 0.903 (0.841 – 0.977) | 0.848 (0.724 – 0.973) |

AUC: area under curve, CI: confidence interval

**Supplementary Table 12: Sensitivity analysis with exclusion of patients with acral and subungual anatomic location and the prediction of metastasis based on models 1,2,3**

| <b>Metastasis prediction – Logistic regression</b> |                     |                     |                     |
|----------------------------------------------------|---------------------|---------------------|---------------------|
|                                                    | Model 1 (OR, 95%CI) | Model 2 (OR, 95%CI) | Model 3 (OR, 95%CI) |
| Breslow thickness<br>( <i>Cont.</i> )              | -                   | 1.35 (1.21 – 1.53)  | 1.20 (1.08 – 1.36)  |
| Histopathologic<br>ulceration ( <i>Present</i> )   | -                   | 2.86 (1.76 – 4.63)  | 2.06 (1.17 – 3.62)  |
| Pigmentation                                       |                     |                     |                     |
| <i>Absent</i>                                      | Ref.                | -                   | Ref.                |
| 25                                                 | 0.83 (0.29 – 2.27)  | -                   | 0.77 (0.26 – 2.18)  |
| 50                                                 | 0.43 (0.15 – 1.24)  | -                   | 0.49 (0.16 – 1.45)  |
| 75                                                 | 0.11 (0.04 – 0.33)  | -                   | 0.16 (0.05 – 0.48)  |
| 100                                                | 0.06 (0.02 – 0.18)  | -                   | 0.09 (0.03 – 0.25)  |
| Dermatoscopic<br>Ulceration                        |                     |                     |                     |
| <i>Absent</i>                                      | Ref.                | -                   | Ref.                |
| 1-49                                               | 1.51 (0.86 – 2.63)  | -                   | 1.12 (0.61 – 2.01)  |
| >50                                                | 4.70 (1.95 – 12.25) | -                   | 2.36 (0.91 – 6.50)  |
| Regression structures                              |                     |                     |                     |
| <i>Absent</i>                                      | Ref.                | -                   | Ref.                |
| 1-49                                               | 0.90 (0.51 – 1.58)  | -                   | 0.99 (0.55 – 1.79)  |
| >50                                                | 0.46 (0.20 – 1.00)  | -                   | 0.43 (0.17 – 0.98)  |
| Blue – white veil                                  | 7.47 (4.27 – 13.68) | -                   | 6.49 (3.58 – 11.75) |

N: number of patients, OR: Odds ratio, CI: confidence interval, Ref.: Reference level, Cont.: continuous. 448 patients included in the analysis. All models were adjusted for age, sex and anatomic location.

**Supplementary Table 13: Sensitivity analysis with exclusion of patients with acral and subungual anatomic location and the prediction of RFS and DMFS based on model 1,2,3**

| <b>Recurrence-Free Survival (RFS) – Cox regression</b>          |                     |                     |                     |
|-----------------------------------------------------------------|---------------------|---------------------|---------------------|
|                                                                 | Model 1 (HR, 95%CI) | Model 2 (HR, 95%CI) | Model 3 (HR, 95%CI) |
| <b>Pigmentation</b>                                             |                     |                     |                     |
| Absent                                                          | Ref.                | -                   | Ref.                |
| 25                                                              | 0.74 (0.27 – 2.03)  | -                   | 0.77 (0.28 – 2.09)  |
| 50                                                              | 0.50 (0.17 – 1.50)  | -                   | 0.56 (0.18 – 1.71)  |
| 75                                                              | 0.45 (0.14 – 1.38)  | -                   | 0.57 (0.18 – 1.82)  |
| 100                                                             | 0.16 (0.05 – 0.50)  | -                   | 0.19 (0.06 – 0.59)  |
| <b>Dermatoscopic ulceration</b>                                 |                     |                     |                     |
| Absent                                                          | Ref.                | -                   | Ref.                |
| 1-49                                                            | 1.29 (0.71 – 2.35)  | -                   | 1.11 (0.59 – 2.08)  |
| >50                                                             | 3.84 (1.77 – 8.33)  | -                   | 2.66 (1.17 – 6.02)  |
| <b>Regression structures</b>                                    |                     |                     |                     |
| Absent                                                          | Ref.                | -                   | Ref.                |
| 1-49                                                            | 0.66 (0.35 – 1.24)  | -                   | 0.74 (0.39 – 1.42)  |
| >50                                                             | 0.41 (0.15 – 1.07)  | -                   | 0.40 (0.15 – 1.08)  |
| Blue-white veil                                                 | 4.53 (2.40 – 8.54)  | -                   | 4.39 (2.30 – 8.36)  |
| Breslow thickness (Cont.)                                       | -                   | 1.09 (1.04 – 1.14)  | 1.08 (1.03 – 1.14)  |
| Histopathologic ulceration (Present)                            | -                   | 2.47 (1.47 – 4.14)  | 1.77 (0.99 – 3.18)  |
| <b>Distant metastasis-free Survival (DMFS) – Cox regression</b> |                     |                     |                     |
|                                                                 | Model 1 (HR, 95%CI) | Model 2 (HR, 95%CI) | Model 3 (HR, 95%CI) |
| <b>Pigmentation</b>                                             |                     |                     |                     |
| Absent                                                          | Ref.                | -                   | Ref.                |
| 25                                                              | 0.66 (0.22 – 1.94)  | -                   | 0.70 (0.24 – 2.06)  |
| 50                                                              | 0.44 (0.13 – 1.44)  | -                   | 0.49 (0.15 – 1.64)  |
| 75                                                              | 0.34 (0.10 – 1.13)  | -                   | 0.46 (0.13 – 1.56)  |
| 100                                                             | 0.14 (0.04 – 0.46)  | -                   | 0.17 (0.05 – 0.56)  |
| <b>Dermatoscopic ulceration</b>                                 |                     |                     |                     |
| Absent                                                          | Ref.                | -                   | Ref.                |
| 1-49                                                            | 1.51 (0.80 – 2.82)  | -                   | 1.36 (0.70 – 2.65)  |
| >50                                                             | 3.19 (1.18 – 8.60)  | -                   | 2.17 (0.70 – 6.14)  |
| <b>Regression structures</b>                                    |                     |                     |                     |
| Absent                                                          | Ref.                | -                   | Ref.                |
| 1-49                                                            | 0.77 (0.39 – 1.53)  | -                   | 0.80 (0.39 – 1.66)  |
| >50                                                             | 0.28 (0.08 – 0.95)  | -                   | 0.26 (0.07 – 0.94)  |
| Blue-white veil                                                 | 4.53 (2.67 – 9.08)  | -                   | 4.31 (2.12 – 8.75)  |
| Breslow thickness (Cont.)                                       | -                   | 1.09 (1.04 – 1.15)  | 1.09 (1.03 – 1.15)  |
| Histopathologic ulceration (Present)                            | -                   | 2.53 (1.42 – 4.49)  | 1.78 (0.92 – 3.42)  |

HR: Hazard ratio, CI: confidence interval, Ref.: Reference level, RFS: recurrence-free survival, DMFS: distant metastasis free survival, Cont.: continuous. 340 patients included in the analysis. All models were adjusted for age, sex and anatomic location.

**Supplementary Table 14: P-value adjustment for multiple comparisons in univariate regression analysis**

|                          | Logistic regression |                       | RFS     |                       | DMFS    |                       |
|--------------------------|---------------------|-----------------------|---------|-----------------------|---------|-----------------------|
|                          | p-value             | Holm Adjusted p-value | p-value | Holm Adjusted p-value | p-value | Holm Adjusted p-value |
| Pigmentation             |                     |                       |         |                       |         |                       |
| Absent                   | Ref.                | Ref.                  | Ref.    | Ref.                  | Ref.    | Ref.                  |
| 25                       | 0.54                | <0.001                | 0.997   | 0.025                 | 0.882   | 0.163                 |
| 50                       | 0.67                | <0.001                | 0.924   | 0.025                 | 0.754   | 0.163                 |
| 75                       | <0.001              | <0.001                | 0.10    | 0.025                 | 0.20    | 0.163                 |
| 100                      | <0.001              | <0.001                | 0.002   | 0.025                 | 0.01    | 0.163                 |
| Colors                   |                     |                       |         |                       |         |                       |
| Brown                    | <0.001              | 0.001                 | 0.008   | 0.008                 | 0.007   | 0.07                  |
| Blue/gray                | 0.008               | 0.054                 | 0.05    | 0.356                 | 0.03    | 0.266                 |
| Red                      | <0.001              | <0.001                | 0.003   | 0.003                 | 0.007   | 0.007                 |
| White                    | <0.001              | 0.001                 | 0.005   | 0.04                  | 0.033   | 0.266                 |
| Black                    | 0.025               | 0.129                 | 0.06    | 0.39                  | 0.196   | 0.421                 |
| Dermatoscopic ulceration |                     |                       |         |                       |         |                       |
| Absent                   | Ref.                | Ref.                  | Ref.    | Ref.                  | Ref.    | Ref.                  |
| 1-49                     | <0.001              | <0.001                | 0.006   | <0.001                | 0.008   | 0.0013                |
| >50                      | <0.001              | <0.001                | <0.001  | <0.001                | <0.001  | 0.0013                |
| Regression structures    |                     |                       |         |                       |         |                       |
| Absent                   | Ref.                | Ref.                  | Ref.    | Ref.                  | Ref.    | Ref.                  |
| 1-49                     | 0.22                | 0.127                 | 0.361   | 0.396                 | 0.453   | 0.351                 |
| >50                      | 0.016               | 0.127                 | 0.066   | 0.396                 | 0.05    | 0.351                 |
| White shiny streaks      | 0.019               | 0.113                 | 0.299   | 0.598                 | 0.108   | 0.421                 |
| Blue-white veil          | <0.001              | <0.001                | 0.0001  | 0.001                 | 0.0003  | 0.004                 |
| Eccentric blotch         | 0.154               | 0.332                 | 0.324   | 0.598                 | 0.232   | 0.421                 |
| Angulated lines          | 0.589               | 0.586                 | 0.07    | 0.396                 | 0.097   | 0.421                 |
| Parallel ridge           | 0.111               | 0.332                 | 0.198   | 0.596                 | 0.084   | 0.421                 |
| Vessels                  |                     |                       |         |                       |         |                       |
| Absent                   | Ref.                | Ref.                  | Ref.    | Ref.                  | Ref.    | Ref.                  |
| 1-49                     | 0.001               | <0.001                | 0.025   | 0.024                 | 0.029   | 0.077                 |
| >50                      | <0.001              | <0.001                | 0.002   | 0.024                 | 0.007   | 0.077                 |

RFS: recurrence-free survival, DMFS: distant metastasis free survival, Ref.: Reference level. p value: unadjusted p value from univariate logistic regression for metastasis prediction and Cox regression for prediction of RFS and DMFS. Global raw p-value derive after the application of omnibus likelihood ratio test in univariate analysis for variables with multiple categories. For binary variables the predictor-level raw p-value is the Wald p-value. Holm adjusted p-value is obtained by applying Holm approach across predictors' raw p-values. Two-sided p-values are reported.

**Supplementary Table 15: Frequencies of dermatoscopic features according to metastatic status at diagnosis**

|                                 | Total (N=143) | Regional metastatic disease at diagnosis (n= 95) | Distant metastatic disease at diagnosis (n=48) | X <sup>2</sup> -test (p-value) |
|---------------------------------|---------------|--------------------------------------------------|------------------------------------------------|--------------------------------|
| Pigmentation (n, %)             |               |                                                  |                                                | 0.405                          |
| Absent                          | 17 (11.9)     | 9 (9.5)                                          | 8 (16.7)                                       |                                |
| 25                              | 49 (34.3)     | 35 (36.8)                                        | 14 (29.2)                                      |                                |
| 50                              | 35 (24.5)     | 26 (27.4)                                        | 9 (18.8)                                       |                                |
| 75                              | 19 (13.3)     | 12 (12.6)                                        | 7 (14.6)                                       |                                |
| 100                             | 23 (16.1)     | 13 (13.7)                                        | 10 (20.8)                                      |                                |
| Colors (n, %)                   |               |                                                  |                                                |                                |
| Brown                           | 107 (74.8)    | 75 (78.9)                                        | 32 (66.7)                                      | 0.110                          |
| Blue/gray                       | 100 (69.9)    | 68 (71.6)                                        | 32 (66.7)                                      | 0.545                          |
| Red                             | 107 (74.8)    | 70 (73.7)                                        | 37 (77.1)                                      | 0.658                          |
| White                           | 99 (69.2)     | 64 (67.4)                                        | 35 (72.9)                                      | 0.497                          |
| Black                           | 63 (44.1)     | 39 (41.1)                                        | 24 (50)                                        | 0.309                          |
| Dermatoscopic ulceration (n, %) |               |                                                  |                                                | 0.607                          |
| Absent                          | 71 (49.7)     | 47 (49.5)                                        | 24 (50)                                        |                                |
| 1-49                            | 36 (25.2)     | 26 (27.4)                                        | 10 (20.8)                                      |                                |
| >50                             | 36 (25.2)     | 22 (23.2)                                        | 14 (29.2)                                      |                                |
| Regression structures (n, %)    |               |                                                  |                                                | 0.773                          |
| Absent                          | 104 (72.7)    | 70 (73.7)                                        | 34 (70.8)                                      |                                |
| 1-49                            | 30 (21)       | 20 (21.1)                                        | 10 (20.8)                                      |                                |
| >50                             | 9 (6.3)       | 5 (5.3)                                          | 4 (8.3)                                        |                                |
| White shiny streaks (n, %)      | 89 (62.2)     | 60 (63.2)                                        | 29 (60.4)                                      | 0.749                          |
| Blue-white veil (n, %)          | 90 (62.9)     | 60 (63.2)                                        | 30 (62.5)                                      | 0.939                          |
| Eccentric blotch (n, %)         | 61 (42.7)     | 40 (42.1)                                        | 21 (43.8)                                      | 0.851                          |
| Angulated lines (n, %)          | 5 (3.5)       | 4 (4.2)                                          | 1 (2.1)                                        | 0.513                          |
| Parallel ridge (n, %)           | 20 (3.8)      | 8 (2.6)                                          | 12 (5.4)                                       | 0.104                          |
| Vessels (n, %)                  |               |                                                  |                                                | 0.02                           |
| Absent                          | 42 (29.4)     | 26 (27.4)                                        | 16 (33.3)                                      |                                |
| 1-49                            | 46 (32.2)     | 25 (26.3)                                        | 21 (43.8)                                      |                                |
| >50                             | 55 (38.5)     | 44 (46.3)                                        | 11 (22.9)                                      |                                |

n: number of patients, Two-sided p-values for categorical variables were obtained from the Pearson's chi-squared test. Pigmentation, dermatoscopic ulceration, regression structures, vessels are expressed as percentages of feature extent in the lesion.

**Supplementary Table 16: Sensitivity analysis for the prediction of metastasis based on Model 1 and after exclusion of patients with metastasis at diagnosis**

|                          | OR   | p-value | 95%CI        |
|--------------------------|------|---------|--------------|
| Pigmentation             |      |         |              |
| <i>Absent</i>            | Ref. |         |              |
| 25                       | 0.57 | 0.346   | 0.17 – 1.83  |
| 50                       | 0.38 | 0.112   | 0.11 – 1.25  |
| 75                       | 0.13 | <0.001  | 0.04 – 0.44  |
| 100                      | 0.06 | <0.001  | 0.02 – 0.21  |
| Dermatoscopic Ulceration |      |         |              |
| <i>Absent</i>            | Ref. |         |              |
| 1-49                     | 1.20 | 0.61    | 0.58 – 2.47  |
| >50                      | 2.85 | 0.04    | 1.05 – 7.75  |
| Regression structures    |      |         |              |
| <i>Absent</i>            | Ref. |         |              |
| 1-49                     | 0.68 | 0.323   | 0.32 – 1.44  |
| >50                      | 0.35 | 0.06    | 0.12 – 1.07  |
| Blue – white veil        | 6.34 | <0.001  | 3.05 – 13.76 |

OR: Odds ratio, CI: confidence interval, Ref.: Reference level. Pigmentation, dermatoscopic ulceration and regression structures are expressed as percentages of feature extent in the lesion. Results from multivariable analysis and Model 1 was adjusted for age, sex and anatomic location. P-values were two-sided and obtained from Wald tests. Exact p-values are provided for 75% pigmentation ( $p=8.52 \times 10^{-4}$ ), 100% pigmentation ( $p=2.73 \times 10^{-6}$ ) and blue-white veil ( $p=1.55 \times 10^{-6}$ ). Multiple comparisons adjustment was not applied.

**Supplementary Table 17: Sensitivity analysis for the prediction of metastasis based on Model 1 after adjustment for histopathologic subtype of the primary tumor**

|                          | OR   | p-value | 95%CI        |
|--------------------------|------|---------|--------------|
| Pigmentation             |      |         |              |
| <i>Absent</i>            | Ref. |         |              |
| 25                       | 1.01 | 0.984   | 0.34 – 3.58  |
| 50                       | 0.43 | 0.100   | 0.17 – 2.16  |
| 75                       | 0.14 | <0.001  | 0.04 – 0.30  |
| 100                      | 0.07 | <0.001  | 0.03 – 0.19  |
| Dermatoscopic Ulceration |      |         |              |
| <i>Absent</i>            | Ref. |         |              |
| 1-49                     | 1.38 | 0.168   | 0.84 – 2.79  |
| >50                      | 3.22 | 0.016   | 1.34 – 8.38  |
| Regression structures    |      |         |              |
| <i>Absent</i>            | Ref. |         |              |
| 1-49                     | 0.81 | 0.193   | 0.42 – 1.67  |
| >50                      | 0.44 | 0.025   | 0.14 – 0.81  |
| Blue – white veil        | 5.90 | <0.001  | 3.06 – 12.68 |

OR: Odds ratio, CI: confidence interval, Ref.: Reference level. Pigmentation, dermatoscopic ulceration and regression structures are expressed as percentages of feature extent in the lesion. Results from last step of multivariable analysis after backward elimination was provided and Model 1 was adjusted for age, sex, anatomic location and histopathologic subtype of the primary tumor. 291 patients had available data about histopathologic subtype. P-values were two-sided and obtained from Wald tests. Exact p-values are provided for pigmentation 75% ( $p=1.30 \times 10^{-4}$ ), pigmentation 100% ( $p=1.62 \times 10^{-8}$ ) and blue-white veil ( $p=9.86 \times 10^{-7}$ ).

**Supplementary Table 18: Subgroup analyses for the prediction of metastasis using model 1 and based on clinically relevant Breslow thickness thresholds in the total cohort**

| Metastasis prediction – Full dataset |               |              |                |              |                |              |
|--------------------------------------|---------------|--------------|----------------|--------------|----------------|--------------|
|                                      | BT<1mm (n=96) |              | BT<2mm (n=295) |              | BT>2mm (n=229) |              |
|                                      | OR            | 95%CI        | OR             | 95%CI        | OR             | 95%CI        |
| Pigmentation                         |               |              |                |              |                |              |
| <i>Absent</i>                        | Ref.          |              | Ref.           |              |                |              |
| 25                                   | Inf.          | Inf.         | 0.80           | 0.17 – 3.60  | 1.18           | 0.39 – 3.53  |
| 50                                   | 0.30          | 0.004-22.9   | 0.48           | 0.11 – 2.02  | 0.59           | 0.17 – 2.04  |
| 75                                   | 0.01          | 0.001 – 0.89 | 0.13           | 0.03 – 0.56  | 0.18           | 0.05 – 0.66  |
| 100                                  | Inf.          | Inf.         | 0.07           | 0.01 – 0.29  | 0.13           | 0.03 – 0.48  |
| Dermatoscopic Ulceration             |               |              |                |              |                |              |
| <i>Absent</i>                        | Ref.          |              | Ref.           |              |                |              |
| 1-49                                 | Inf.          | Inf.         | 1.43           | 0.59 – 3.44  | 0.73           | 0.35 – 1.52  |
| >50                                  | Inf.          | Inf.         | 9.76           | 1.30 – 73.14 | 1.41           | 0.55 – 3.61  |
| Regression structures                |               |              |                |              |                |              |
| <i>Absent</i>                        | Ref.          |              | Ref.           |              | Ref.           |              |
| 1-49                                 | 0.16          | 0.01 – 1.87  | 0.82           | 0.38 – 1.76  | 0.73           | 0.32 – 1.68  |
| >50                                  | 0.64          | 0.05 – 7.43  | 0.56           | 0.18 – 1.73  | 0.30           | 0.10 – 0.91  |
| Blue – white veil ( <i>Present</i> ) | 8.39          | 1.38 – 50.86 | 4.10           | 2.03 – 8.35  | 8.06           | 3.37 – 19.25 |

n=number of patients, Ref.: Reference level, OR: Odds Ratio, CI: Confidence Interval, Inf.: Infinite, BT: Breslow thickness. Pigmentation, dermatoscopic ulceration and regression structures are expressed as percentages of feature extent in the lesion. Model 1 was adjusted for age, sex and anatomic location.

**Supplementary Table 19: Subgroup analyses for the prediction RFS and DMFS using model 1 and based on clinically relevant Breslow thickness thresholds in patients with early-stage melanomas**

| <b>Recurrence – Free Survival (RFS)</b>        |               |       |                |              |                |              |
|------------------------------------------------|---------------|-------|----------------|--------------|----------------|--------------|
|                                                | BT<1mm (n=82) |       | BT<2mm (n=254) |              | BT>2mm (n=127) |              |
|                                                | HR            | 95%CI | HR             | 95%CI        | HR             | 95%CI        |
| <b>Pigmentation</b>                            |               |       |                |              |                |              |
| <i>Absent</i>                                  | Ref.          |       | Ref.           |              | Ref.           |              |
| 25                                             | Inf.          | Inf.  | 0.48           | 0.07 – 3.05  | 0.78           | 0.27 – 2.20  |
| 50                                             | Inf.          | Inf.  | 0.24           | 0.03 – 1.74  | 0.76           | 0.24 – 2.35  |
| 75                                             | Inf.          | Inf.  | 0.26           | 0.04 – 1.61  | 0.57           | 0.17 – 1.89  |
| 100                                            | Inf.          | Inf.  | 0.11           | 0.01 – 0.69  | 0.17           | 0.04 – 0.65  |
| <b>Dermatoscopic Ulceration</b>                |               |       |                |              |                |              |
| <i>Absent</i>                                  | Ref.          |       | Ref.           |              |                |              |
| 1-49                                           | Inf.          | Inf.  | 1.45           | 0.39 – 5.35  | 0.87           | 0.44 – 1.71  |
| >50                                            | Inf.          | Inf.  | 14.97          | 3.49 – 64.17 | 1.37           | 0.58 – 3.21  |
| <b>Regression structures</b>                   |               |       |                |              |                |              |
| <i>Absent</i>                                  | Ref.          |       | Ref.           |              | Ref.           |              |
| 1-49                                           | Inf.          | Inf.  | 0.68           | 0.26 – 1.78  | 0.45           | 0.19 – 1.03  |
| >50                                            | Inf.          | Inf.  | 0.53           | 0.11 – 2.49  | 0.26           | 0.07 – 0.89  |
| <b>Blue – white veil (Present)</b>             | Inf.          | Inf.  | 2.59           | 1.01 – 6.72  | 4.76           | 2.08 – 10.93 |
| <b>Distant metastasis-free survival (DMFS)</b> |               |       |                |              |                |              |
| <b>Pigmentation</b>                            |               |       |                |              |                |              |
| <i>Absent</i>                                  | Ref.          |       | Ref.           |              | Ref.           |              |
| 25                                             | Inf.          | Inf.  | 0.55           | 0.81 – 3.76  | 0.81           | 0.25 – 2.75  |
| 50                                             | Inf.          | Inf.  | 0.19           | 0.02 – 1.66  | 0.98           | 0.27 – 3.55  |
| 75                                             | Inf.          | Inf.  | 0.16           | 0.02 – 1.23  | 0.71           | 0.18 – 2.75  |
| 100                                            | Inf.          | Inf.  | 0.09           | 0.01 – 0.61  | 0.24           | 0.05 – 1.05  |
| <b>Dermatoscopic Ulceration</b>                |               |       |                |              |                |              |
| <i>Absent</i>                                  | Ref.          |       | Ref.           |              | Ref.           |              |
| 1-49                                           | Inf.          | Inf.  | 1.45           | 0.30 – 7.03  | 0.86           | 0.41 – 1.79  |
| >50                                            | Inf.          | Inf.  | Inf.           | Inf.         | 1.06           | 0.37 – 3.03  |
| <b>Regression structures</b>                   |               |       |                |              |                |              |
| <i>Absent</i>                                  | Ref.          |       | Ref.           |              | Ref.           |              |
| 1-49                                           | Inf.          | Inf.  | 0.93           | 0.29 – 2.96  | 0.50           | 0.21 – 1.18  |
| >50                                            | Inf.          | Inf.  | 0.36           | 0.04 – 3.07  | 0.20           | 0.04 – 0.83  |
| <b>Blue – white veil (Present)</b>             | Inf.          | Inf.  | 3.03           | 0.97 – 9.48  | 4.26           | 1.74 – 10.46 |

n=number of patients, Ref.: Reference level, HR: Hazard Ratio, CI: Confidence Interval, Inf.: Infinitive, BT: Breslow thickness. Model 1 was adjusted for age, sex and anatomic location.

**Supplementary Table 20: Demographic characteristics and institutions of evaluators who participated in lesions evaluation.**

| No of evaluators | Age (median, range) | Sex (n, %)                 | Years of experience in dermatoscopy (median, range) | Institutions of evaluators                            |
|------------------|---------------------|----------------------------|-----------------------------------------------------|-------------------------------------------------------|
| 30               | 52 (29 – 70)        | M: 18 (60%)<br>F: 12 (40%) | 19 (2 – 35)                                         | 5 Europe, 2 South America, 1 Asia, 1 USA, 2 Australia |

n: number of readers participated in image evaluation

**Supplementary Table 21: Description of dermatoscopic criteria included in the analysis**

| Dermatoscopic criteria   | Type of variable | Possible values of the variable         |
|--------------------------|------------------|-----------------------------------------|
| Grade of pigmentation    | Ordinal          | 0, 25, 50, 75, 100                      |
| Ulceration               | Ordinal          | 0, 25, 50, 75, 100                      |
| Regression structures    | Ordinal          | 0, 25, 50, 75, 100                      |
| Extension of vascularity | Ordinal          | 0, 25, 50, 75, 100                      |
| Type of vessels          | Categorical      | Absent, Dotted/Coiled, Linear/Irregular |
| Brown color              | Binary           | Present / Absent                        |
| Blue/gray color          | Binary           | Present / Absent                        |
| Red color                | Binary           | Present / Absent                        |
| White color              | Binary           | Present / Absent                        |
| White color              | Binary           | Present / Absent                        |
| White shiny streaks      | Binary           | Present / Absent                        |
| Blue-white veil          | Binary           | Present / Absent                        |
| Eccentric blotch         | Binary           | Present / Absent                        |
| Angulated lines          | Binary           | Present / Absent                        |
| Parallel ridge           | Binary           | Present / Absent                        |

## Supplementary Figures

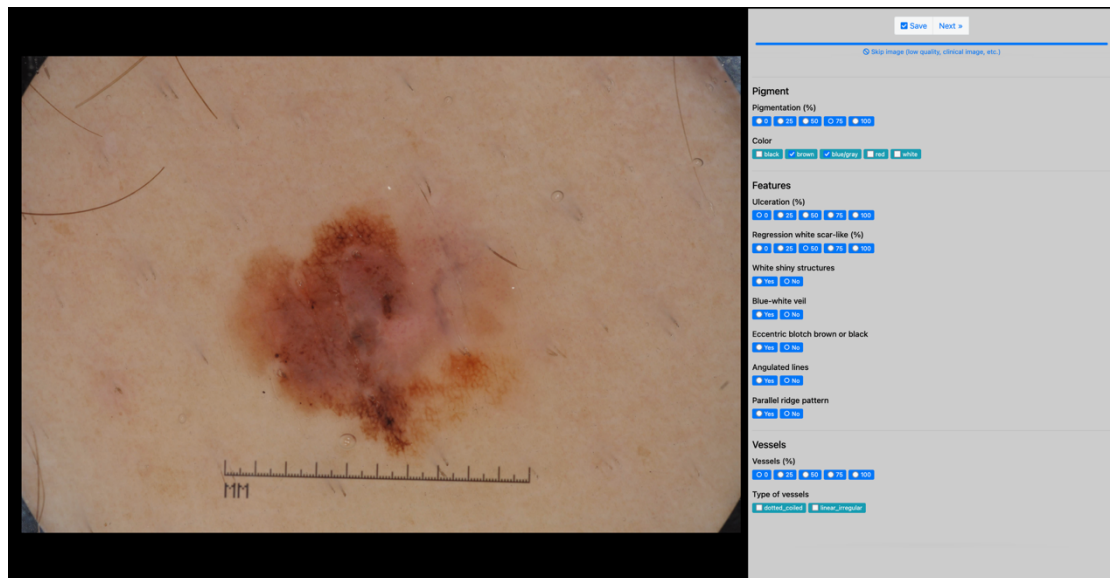

**Supp. Figure 1:** Example of the questionnaire and the web-based interface for lesion evaluation.
