# Supplementary material for: Predictive models of melanoma metastasis based on dermatoscopy in an international retrospective human reader study
Source: Springer Nature journal article supplement (doi:10.1038/s41467-025-65972-w), 2025-12-08
Supplement: MOESM4 [file 41467_2025_65972_MOESM4_ESM.xlsx]

## Sheet: Overview
	Predictive models of melanoma metastasis based on dermatoscopy in an international retrospective human reader study
	Figure 1e.	Counts of AJCC stages at diagnosis and at last follow-up
	Figure 2a.	Odds Ratio with 95% Confidence Intervals for the prediction of melanoma metastasis based on dermatoscopy (model 1)
	Figure2b.	Area under the curve and 95% Confidence Intervals for the prediction of metastasis based on three models
	Figure2c.	Accurate and false predictions of model 1 and classification based on status of parameters included in model 1
	Figure3a.	Perfomance metrics of models 1,2,3 for the prediction of Recurrence-free Survival (RFS) in patients with early-stage melanomas
	Figure3b.	Perfomance metrics of models 1,2,3 for the prediction of Distant metastasis-free survival (DMFS) in patients with early-stage melanomas
	Figure3c.	RFS of patients with early-stage melanomas according to model 1 prediction in training set (predicted-metastatic and predicted non-metastatic)
	Figure3d.	RFS of patients with early-stage melanomas according to model 1 prediction in test set (predicted-metastatic and predicted non-metastatic)
	Figure4a.	RFS of patients with early-stage melanomas based on prediction of model 1 and stratified by AJCC risk groups in training set(IB/IIA:low risk, IIB/IIC: high-risk)
	Figure4b.	RFS of patients with early-stage melanomas based on prediction of model 1 and stratified by AJCC risk groups in test set(IB/IIA:low risk, IIB/IIC: high-risk)
	Figure4c.	RFS of patients with AJCC low risk early-stage melanomas based on prediction of model 1 in training set
	Figure 4d.	RFS of patients with AJCC low risk early-stage melanomas based on prediction of model 1 in test set

## Sheet: Fig.1e.
Stage at diagnosis	Stage at last follow up	Counts
IB	IB	204
IB	III	6
IB	IV	17
IIA	IIA	52
IIA	III	2
IIA	IV	12
IIB	IIB	31
IIB	III	5
IIB	IV	17
IIC	IIC	15
IIC	III	3
IIC	IV	17
III	III	51
III	IV	44
IV	IV	48

## Sheet: Fig2a.
	Non-metastatic	Metastatic	OR	low	hi		Logistic regression - Model 1
Pigmentation							term	estimate	std.error	statistic	p.value	conf.low	conf.high
Absent (ref)	15	27					(Intercept)	0.810141	0.658735	-0.319623	0.749254	0.221638	2.9569
25	29	66	1.07	0.45	2.54		pigmentation25	1.07806	0.438697	0.171336	0.86396	0.452535	2.54529
50	36	55	0.5	0.2	1.22		pigmentation50	0.504638	0.454644	-1.50429	0.132507	0.204315	1.22201
75	86	35	0.14	0.05	0.33		pigmentation75	0.140044	0.451746	-4.35156	1.35173e-05	0.0566896	0.33511
100	136	39	0.07	0.03	0.18		pigmentation100	0.0746474	0.46064	-5.63342	1.7667e-08	0.0296773	0.181573
Dermatoscopic ulceration							`ulcer_(0, 1= 1-49, 2>50)`1	1.4591	0.259868	1.45389	0.145977	0.875113	2.4284
Absent (ref)	238	114					`ulcer_(0, 1= 1-49, 2>50)`2	3.45718	0.393316	3.15384	0.00161137	1.63352	7.69802
1 to 49	51	55	1.46	0.87	2.42		`regress_(0, 1= 1-49, 2=>50)`1	0.758533	0.26735	-1.03373	0.30126	0.446568	1.27635
>50	13	53	3.45	1.63	7.69		`regress_(0, 1= 1-49, 2=>50)`2	0.420583	0.389688	-2.22258	0.0262439	0.190939	0.886582
Regression structures							bluewhiteveil1	6.43006	0.267064	6.9683	3.20785e-12	3.87191	11.0623
Absent (ref)	192	161					Age	1.0079	0.00667867	1.17881	0.238474	0.994865	1.02132
1 to 49	73	47	0.75	0.44	1.27		`sex (1 m, 2 f)`2	0.8736	0.229711	-0.588272	0.55635	0.555954	1.3701
>50	37	14	0.42	0.19	0.89		`Anatomic site_`2	0.697494	0.327007	-1.10169	0.270594	0.366454	1.32426
Blue white veil							`Anatomic site_`3	0.635367	0.328627	-1.38014	0.167543	0.33277	1.2103
Absent (ref)	175	80					`Anatomic site_`4	1.44803	0.405449	0.91307	0.361206	0.655346	3.2238
Present	127	142	6.43	3.87	11.06

## Sheet: Fig.2b
ID_1	fold	event	prob		ID_1	First_metastasis (event)	pred_prob	lp		Model 1 - Dermatoscopy only
5	1.00	1	0.469012		11	1	0.617542	0.47913			Training set
18	1.00	0	0.456729		73	0	0.0697851	-2.58999			Fold	AUC	AUC_CI_Lower	AUC_CI_Upper
28	1.00	1	0.351		108	1	0.528518	0.114196			1.00	0.784524	0.694134	0.874913
35	1.00	1	0.475158		171	0	0.512388	0.0495621			2.00	0.7656	0.646675	0.884525
75	1.00	1	0.486377		175	1	0.758538	1.14468			3.00	0.906312	0.830872	0.981753
87	1.00	0	0.333085		218	1	0.490811	-0.0367604			4.00	0.795635	0.700749	0.890521
91	1.00	1	0.902292		237	1	0.88425	2.03331			5.00	0.76084	0.65089	0.87079
106	1.00	0	0.087746		242	0	0.194643	-1.42012
113	1.00	1	0.638963		302	0	0.476358	-0.094638			Average	0.802582	0.750275	0.85489
120	1.00	0	0.0437599		364	1	0.285647	-0.916622
151	1.00	0	0.729725		384	1	0.326737	-0.722982			Test set
198	1.00	1	0.336048		394	0	0.704067	0.866741			AUC	CI_Lower	CI_Upper
199	1.00	1	0.56627		395	1	0.286803	-0.910963			0.813265	0.731097	0.895434
220	1.00	0	0.494773		444	1	0.875064	1.94649
224	1.00	1	0.75101		456	0	0.280946	-0.939773
376	1.00	1	0.848171		2	0	0.280928	-0.939861		Model 2 - Breslow thickness/Histopathologic Ulceration
396	1.00	1	0.343523		8	0	0.0457216	-3.03838			Training set
443	1.00	0	0.0819861		12	1	0.211012	-1.31884			Fold	AUC	AUC_CI_Lower	AUC_CI_Upper
463	1.00	0	0.337439		44	1	0.287997	-0.905134			1.00	0.699206	0.587116	0.811297
490	1.00	0	0.0676348		51	0	0.265075	-1.01975			2.00	0.766531	0.656182	0.876879
505	1.00	1	0.727189		53	0	0.389636	-0.448841			3.00	0.821262	0.719683	0.922842
507	1.00	1	0.292513		66	0	0.833143	1.60807			4.00	0.804067	0.703778	0.904357
518	1.00	0	0.20377		71	0	0.342315	-0.652995			5.00	0.696477	0.575305	0.817648
14	1.00	0	0.0882828		99	1	0.227328	-1.22346
15	1.00	0	0.318973		110	0	0.206797	-1.34434			Average	0.758582	0.707275	0.80189
29	1.00	1	0.761992		123	1	0.82242	1.53283
32	1.00	0	0.201029		127	1	0.926976	2.54113			Test set
38	1.00	0	0.399045		129	1	0.428266	-0.288929			AUC	CI_Lower	CI_Upper
46	1.00	0	0.0830784		132	1	0.909194	2.30384			0.777143	0.68316	0.871125
49	1.00	0	0.940217		137	1	0.745049	1.07238
64	1.00	1	0.361986		179	0	0.0518015	-2.90715
84	1.00	0	0.382822		184	0	0.27512	-0.9688
89	1.00	0	0.328815		193	1	0.396043	-0.421979		Model 3 - Combination of dermatoscopy, Breslow thickness and ulceration
90	1.00	0	0.37135		201	1	0.954403	3.04124			Training set
97	1.00	0	0.0603709		219	1	0.844721	1.69378			Fold	AUC	AUC_CI_Lower	AUC_CI_Upper
116	1.00	1	0.836534		262	0	0.227858	-1.22045			1.00	0.804365	0.720296	0.888435
145	1.00	1	0.818173		295	1	0.7346	1.01809			2.00	0.822041	0.711698	0.932383
167	1.00	0	0.311107		300	0	0.0305386	-3.45775			3.00	0.908306	0.843924	0.972687
176	1.00	1	0.914773		309	0	0.0552617	-2.83883			4.00	0.857639	0.774041	0.941237
188	1.00	1	0.735153		315	1	0.237264	-1.16774			5.00	0.751355	0.638026	0.864684
197	1.00	1	0.447793		331	1	0.456815	-0.173173
207	1.00	0	0.30929		339	0	0.280425	-0.942354			Average	0.828741	0.783214	0.8738
214	1.00	0	0.987576		350	1	0.862081	1.83269
240	1.00	0	0.39618		351	0	0.0567921	-2.80989			Test set
241	1.00	0	0.328815		363	0	0.0467481	-3.0151			AUC	CI_Lower	CI_Upper
248	1.00	0	0.0957908		373	0	0.180982	-1.50971			0.833061	0.755054	0.911068
272	1.00	0	0.0839383		390	0	0.121479	-1.9785
273	1.00	0	0.364417		392	0	0.224292	-1.24082
291	1.00	0	0.262567		436	1	0.388498	-0.453631
313	1.00	0	0.0672032		479	1	0.668649	0.70208
403	1.00	0	0.512209		486	0	0.393509	-0.432586
414	1.00	0	0.276728		83	0	0.364111	-0.557566
425	1.00	0	0.0635371		101	0	0.232848	-1.1923
430	1.00	0	0.0478784		125	0	0.196795	-1.40645
447	1.00	0	0.64721		208	1	0.250317	-1.09692
452	1.00	0	0.0987505		227	1	0.218688	-1.27333
481	1.00	0	0.232878		233	0	0.763245	1.17055
482	1.00	0	0.100922		334	0	0.340835	-0.659575
484	1.00	0	0.166961		352	1	0.81832	1.50501
492	1.00	1	0.538524		372	1	0.791217	1.33228
10	1.00	1	0.244747		409	0	0.468112	-0.127723
20	1.00	0	0.409159		485	0	0.270371	-0.992743
31	1.00	0	0.732215		506	0	0.0892023	-2.32341
78	1.00	0	0.228543		515	1	0.835282	1.62353
124	1.00	1	0.944183		25	0	0.276776	-0.960509
147	1.00	0	0.472562		36	1	0.141167	-1.80563
185	1.00	0	0.16572		45	0	0.10434	-2.14991
195	1.00	1	0.218581		74	0	0.041125	-3.14914
286	1.00	0	0.283438		107	1	0.423403	-0.308821
406	1.00	0	0.288058		134	1	0.906964	2.27712
476	1.00	1	0.896743		221	0	0.201409	-1.37751
480	1.00	0	0.516014		252	0	0.117139	-2.01981
498	1.00	0	0.521624		265	0	0.23982	-1.15366
7	1.00	0	0.293036		268	1	0.263092	-1.02996
21	1.00	1	0.674443		292	1	0.510184	0.0407422
34	1.00	1	0.211297		298	1	0.232848	-1.1923
92	1.00	1	0.240749		380	1	0.804319	1.41351
148	1.00	1	0.596975		416	0	0.177942	-1.53035
211	1.00	1	0.080568		421	0	0.0891919	-2.32354
231	1.00	0	0.19864		437	0	0.176214	-1.54221
261	1.00	0	0.0572382		495	0	0.821736	1.52816
288	1.00	0	0.0531387		511	0	0.0482779	-2.9813
319	1.00	0	0.0375319		521	0	0.461604	-0.153889
325	1.00	0	0.0427181		16	1	0.900167	2.19908
369	1.00	0	0.807611		40	0	0.359105	-0.579253
381	1.00	0	0.527229		133	1	0.672954	0.721575
399	1.00	0	0.329964		143	1	0.864022	1.8491
434	1.00	1	0.671228		155	1	0.636082	0.558401
475	1.00	0	0.450466		181	0	0.757966	1.14156
493	1.00	0	0.385152		200	1	0.910951	2.3253
503	1.00	1	0.353973		271	1	0.857785	1.79701
508	1.00	0	0.193154		278	0	0.884943	2.0401
50	1.00	1	0.756189		285	1	0.981954	3.99664
104	1.00	0	0.934446		303	1	0.978181	3.80293
228	1.00	1	0.739868		326	1	0.111631	-2.07418
238	1.00	0	0.19353		335	0	0.555178	0.221616
243	1.00	1	0.587743		345	1	0.939325	2.73963
281	1.00	1	0.175628		359	1	0.978909	3.8376
290	1.00	1	0.908671		435	1	0.980408	3.91284
328	1.00	1	0.932058
336	1.00	1	0.597421
378	1.00	1	0.71547
426	1.00	0	0.0694152
13	2.00	0	0.151782
68	2.00	1	0.355655
118	2.00	0	0.146086
131	2.00	0	0.505628
182	2.00	0	0.0657113
235	2.00	0	0.306682
246	2.00	0	0.0980143
346	2.00	0	0.629173
361	2.00	1	0.895616
441	2.00	0	0.364538
461	2.00	0	0.0556838
24	2.00	0	0.136455
43	2.00	0	0.301464
55	2.00	1	0.847438
57	2.00	0	0.244129
77	2.00	0	0.207207
85	2.00	1	0.686545
95	2.00	1	0.814868
161	2.00	1	0.0884878
180	2.00	1	0.736549
222	2.00	0	0.0470865
263	2.00	0	0.194705
297	2.00	1	0.84773
299	2.00	0	0.142337
310	2.00	1	0.971878
329	2.00	0	0.0521109
332	2.00	0	0.0348875
375	2.00	1	0.338369
377	2.00	0	0.0449346
388	2.00	0	0.298788
389	2.00	1	0.94922
418	2.00	0	0.787447
6	2.00	0	0.937958
69	2.00	0	0.0317996
112	2.00	0	0.159393
186	2.00	0	0.31223
190	2.00	0	0.486991
191	2.00	0	0.0998421
203	2.00	0	0.207425
239	2.00	0	0.202682
258	2.00	1	0.180185
264	2.00	0	0.188803
354	2.00	1	0.235488
504	2.00	0	0.418395
519	2.00	1	0.244282
3	2.00	0	0.329137
27	2.00	0	0.50912
37	2.00	0	0.23029
70	2.00	0	0.0933825
128	2.00	0	0.255963
139	2.00	1	0.149798
177	2.00	0	0.0534399
189	2.00	1	0.672642
216	2.00	1	0.953288
274	2.00	0	0.253812
324	2.00	0	0.0473108
341	2.00	1	0.297847
366	2.00	0	0.0767015
397	2.00	0	0.629443
467	2.00	0	0.0346726
513	2.00	1	0.0884154
59	2.00	1	0.151459
60	2.00	0	0.115895
63	2.00	0	0.111786
79	2.00	1	0.764338
119	2.00	0	0.632227
158	2.00	1	0.69397
226	2.00	0	0.422242
249	2.00	0	0.776228
282	2.00	1	0.919195
284	2.00	1	0.799499
407	2.00	0	0.202006
442	2.00	1	0.869808
448	2.00	0	0.93566
419	2.00	0	0.571898
126	3.00	0	0.332703
152	3.00	1	0.527655
159	3.00	1	0.697306
174	3.00	0	0.457137
382	3.00	0	0.179907
468	3.00	0	0.103179
26	3.00	0	0.26026
41	3.00	1	0.674292
42	3.00	1	0.752141
48	3.00	0	0.518465
146	3.00	1	0.783211
150	3.00	0	0.167629
166	3.00	0	0.140755
172	3.00	1	0.25195
187	3.00	0	0.0852435
192	3.00	1	0.490779
196	3.00	0	0.51665
230	3.00	0	0.287251
234	3.00	1	0.862257
255	3.00	1	0.798247
296	3.00	0	0.488184
320	3.00	0	0.450644
321	3.00	0	0.387965
343	3.00	1	0.876576
344	3.00	1	0.829472
349	3.00	1	0.502817
360	3.00	1	0.505318
404	3.00	0	0.392123
411	3.00	0	0.444956
417	3.00	0	0.201855
429	3.00	0	0.30251
433	3.00	0	0.0324227
440	3.00	1	0.76274
472	3.00	0	0.0637384
474	3.00	1	0.760693
491	3.00	1	0.675624
510	3.00	0	0.271612
516	3.00	0	0.499865
86	3.00	1	0.229161
163	3.00	1	0.307676
168	3.00	0	0.40842
225	3.00	0	0.11709
316	3.00	1	0.799352
357	3.00	0	0.360732
401	3.00	0	0.291799
445	3.00	0	0.245088
502	3.00	0	0.417231
102	3.00	1	0.584267
121	3.00	0	0.474206
138	3.00	1	0.426984
178	3.00	0	0.19653
279	3.00	1	0.615266
283	3.00	1	0.58028
287	3.00	0	0.345966
340	3.00	1	0.549174
355	3.00	1	0.554411
370	3.00	1	0.523134
374	3.00	0	0.0718803
391	3.00	1	0.782672
439	3.00	0	0.262214
449	3.00	0	0.197727
478	3.00	0	0.0613707
501	3.00	0	0.398795
517	3.00	0	0.393862
93	3.00	1	0.582229
136	3.00	1	0.125842
141	3.00	1	0.971465
149	3.00	1	0.713192
202	3.00	1	0.676018
247	3.00	1	0.70971
301	3.00	1	0.614179
305	3.00	1	0.962037
314	3.00	0	0.164226
420	3.00	0	0.365752
438	3.00	0	0.264286
499	3.00	0	0.602922
413	3.00	0	0.446771
453	3.00	0	0.307888
1	4.00	1	0.295983
109	4.00	1	0.512589
215	4.00	1	0.702679
217	4.00	0	0.372425
275	4.00	1	0.793558
276	4.00	1	0.0637837
333	4.00	0	0.312606
387	4.00	0	0.178086
402	4.00	0	0.0488371
412	4.00	0	0.0508073
423	4.00	0	0.401176
427	4.00	0	0.057816
431	4.00	0	0.751857
477	4.00	1	0.881474
22	4.00	0	0.235391
81	4.00	0	0.040099
114	4.00	1	0.687069
135	4.00	1	0.690248
154	4.00	1	0.377101
156	4.00	0	0.042396
162	4.00	0	0.248791
169	4.00	1	0.288564
170	4.00	0	0.0901545
204	4.00	1	0.248095
236	4.00	0	0.241295
244	4.00	1	0.937762
250	4.00	0	0.20554
251	4.00	0	0.426154
267	4.00	0	0.177952
277	4.00	1	0.174173
306	4.00	1	0.208632
308	4.00	0	0.0330082
322	4.00	1	0.947631
323	4.00	0	0.413624
330	4.00	0	0.795573
386	4.00	0	0.0855009
408	4.00	0	0.148002
424	4.00	0	0.423107
446	4.00	0	0.209767
451	4.00	0	0.0352939
457	4.00	0	0.287905
459	4.00	1	0.243933
471	4.00	1	0.723006
488	4.00	0	0.034207
489	4.00	0	0.191347
512	4.00	0	0.105166
30	4.00	0	0.0410476
54	4.00	0	0.0634566
62	4.00	1	0.0384042
94	4.00	1	0.898855
165	4.00	0	0.11562
183	4.00	1	0.669768
266	4.00	1	0.361866
312	4.00	0	0.0807925
348	4.00	0	0.544241
358	4.00	1	0.366517
368	4.00	1	0.866586
405	4.00	1	0.363249
460	4.00	0	0.421936
33	4.00	0	0.438436
39	4.00	0	0.612693
96	4.00	0	0.70677
98	4.00	0	0.465505
122	4.00	0	0.272777
164	4.00	0	0.515156
206	4.00	0	0.224803
209	4.00	0	0.19939
213	4.00	0	0.67348
259	4.00	0	0.0362329
337	4.00	0	0.173358
365	4.00	0	0.021466
371	4.00	1	0.542207
393	4.00	1	0.359653
398	4.00	0	0.0423932
450	4.00	1	0.711738
466	4.00	0	0.0942056
473	4.00	1	0.256957
500	4.00	1	0.805161
17	4.00	0	0.446348
56	4.00	0	0.234329
76	4.00	0	0.631822
82	4.00	1	0.951741
105	4.00	1	0.879361
144	4.00	0	0.389885
205	4.00	1	0.904718
210	4.00	0	0.45051
223	4.00	1	0.964702
245	4.00	1	0.763703
304	4.00	1	0.885019
353	4.00	1	0.529069
462	4.00	0	0.321886
432	4.00	0	0.340714
58	5.00	1	0.61026
80	5.00	0	0.455943
103	5.00	1	0.405148
115	5.00	1	0.862908
140	5.00	0	0.666136
153	5.00	0	0.586752
157	5.00	0	0.0704145
173	5.00	0	0.0907636
194	5.00	0	0.0905116
229	5.00	1	0.782798
232	5.00	1	0.464797
367	5.00	0	0.3445
497	5.00	0	0.30283
524	5.00	0	0.151782
19	5.00	0	0.326901
23	5.00	0	0.0321014
47	5.00	1	0.0441215
52	5.00	1	0.264052
61	5.00	0	0.195274
117	5.00	1	0.175506
130	5.00	1	0.453488
160	5.00	1	0.296199
254	5.00	0	0.193836
257	5.00	1	0.943401
289	5.00	1	0.860156
293	5.00	1	0.473002
317	5.00	1	0.816328
327	5.00	0	0.158713
338	5.00	0	0.179452
342	5.00	0	0.365816
347	5.00	1	0.454246
385	5.00	1	0.156543
464	5.00	0	0.556755
465	5.00	1	0.814359
483	5.00	1	0.494882
487	5.00	0	0.0852826
496	5.00	1	0.240429
523	5.00	0	0.233432
67	5.00	1	0.523799
212	5.00	1	0.208182
280	5.00	1	0.117081
318	5.00	0	0.219136
356	5.00	1	0.491178
362	5.00	1	0.201481
379	5.00	0	0.73099
410	5.00	0	0.0417705
455	5.00	0	0.0609628
494	5.00	1	0.969832
509	5.00	0	0.449791
4	5.00	1	0.0338624
9	5.00	0	0.0870375
65	5.00	1	0.512946
72	5.00	0	0.22071
88	5.00	0	0.46662
260	5.00	0	0.296027
269	5.00	0	0.0568222
270	5.00	0	0.539556
294	5.00	0	0.036079
307	5.00	0	0.515687
311	5.00	0	0.224413
383	5.00	0	0.0450712
400	5.00	0	0.226549
415	5.00	1	0.894332
422	5.00	0	0.176521
428	5.00	0	0.283444
454	5.00	1	0.960272
469	5.00	1	0.894541
514	5.00	1	0.888224
522	5.00	0	0.496895
100	5.00	0	0.23277
111	5.00	1	0.681281
142	5.00	0	0.325458
253	5.00	1	0.986119
458	5.00	1	0.182529
470	5.00	1	0.862405
520	5.00	0	0.0603489
256	5.00	1	0.939029

## Sheet: Fig.2c.
ID_1	event	prob	predicted_group_ (0 non-metastatic, 1 metastatic)	Class
305	1	0.962037	1	4
214	0	0.987576	1	3
322	1	0.947631	1	4
454	1	0.960272	1	4
244	1	0.937762	1	4
257	1	0.943401	1	4
310	1	0.971878	1	4
141	1	0.971465	1	4
494	1	0.969832	1	4
253	1	0.986119	1	4
216	1	0.953288	1	4
94	1	0.898855	1	4
223	1	0.964702	1	4
389	1	0.94922	1	4
415	1	0.894332	1	4
124	1	0.944183	1	4
343	1	0.876576	1	4
289	1	0.860156	1	4
6	0	0.937958	1	3
317	1	0.816328	1	4
476	1	0.896743	1	4
474	1	0.760693	1	4
477	1	0.881474	1	4
91	1	0.902292	1	4
379	0	0.73099	1	3
328	1	0.932058	1	4
470	1	0.862405	1	4
471	1	0.723006	1	4
42	1	0.752141	1	4
85	1	0.686545	1	4
67	1	0.523799	1	4
316	1	0.799352	1	4
344	1	0.829472	1	4
255	1	0.798247	1	4
256	1	0.939029	1	4
469	1	0.894541	1	4
500	1	0.805161	1	4
55	1	0.847438	1	4
234	1	0.862257	1	4
514	1	0.888224	1	4
49	0	0.940217	1	3
176	1	0.914773	1	4
391	1	0.782672	1	4
450	1	0.711738	1	4
105	1	0.879361	1	4
282	1	0.919195	1	4
96	0	0.70677	1	3
224	1	0.75101	1	4
418	0	0.787447	1	3
304	1	0.885019	1	4
21	1	0.674443	1	4
188	1	0.735153	1	4
275	1	0.793558	1	4
442	1	0.869808	1	4
491	1	0.675624	1	4
505	1	0.727189	1	4
114	1	0.687069	1	4
135	1	0.690248	1	4
431	0	0.751857	1	3
283	1	0.58028	1	4
159	1	0.697306	1	4
180	1	0.736549	1	4
355	1	0.554411	1	4
50	1	0.756189	1	4
330	0	0.795573	1	3
376	1	0.848171	1	4
440	1	0.76274	1	4
369	0	0.807611	1	3
115	1	0.862908	1	4
297	1	0.84773	1	4
116	1	0.836534	1	4
189	1	0.672642	1	4
279	1	0.615266	1	4
121	0	0.474206	0	1
164	0	0.515156	1	3
151	0	0.729725	1	3
371	1	0.542207	1	4
228	1	0.739868	1	4
111	1	0.681281	1	4
499	0	0.602922	1	3
301	1	0.614179	1	4
15	0	0.318973	0	1
17	0	0.446348	0	1
22	0	0.235391	0	1
26	0	0.26026	0	1
37	0	0.23029	0	1
61	0	0.195274	0	1
84	0	0.382822	0	1
89	0	0.328815	0	1
203	0	0.207425	0	1
206	0	0.224803	0	1
210	0	0.45051	0	1
226	0	0.422242	0	1
231	0	0.19864	0	1
241	0	0.328815	0	1
250	0	0.20554	0	1
254	0	0.193836	0	1
274	0	0.253812	0	1
286	0	0.283438	0	1
311	0	0.224413	0	1
318	0	0.219136	0	1
333	0	0.312606	0	1
338	0	0.179452	0	1
400	0	0.226549	0	1
414	0	0.276728	0	1
428	0	0.283444	0	1
445	0	0.245088	0	1
449	0	0.197727	0	1
453	0	0.307888	0	1
481	0	0.232878	0	1
518	0	0.20377	0	1
523	0	0.233432	0	1
306	1	0.208632	0	2
103	1	0.405148	1	4
57	0	0.244129	0	1
72	0	0.22071	0	1
207	0	0.30929	0	1
240	0	0.39618	0	1
273	0	0.364417	0	1
510	0	0.271612	0	1
1	1	0.295983	0	2
235	0	0.306682	0	1
239	0	0.202682	0	1
68	1	0.355655	0	2
354	1	0.235488	0	2
28	1	0.351	0	2
172	1	0.25195	0	2
204	1	0.248095	0	2
258	1	0.180185	0	2
459	1	0.243933	0	2
503	1	0.353973	0	2
23	0	0.0321014	0	1
259	0	0.0362329	0	1
294	0	0.036079	0	1
324	0	0.0473108	0	1
402	0	0.0488371	0	1
425	0	0.0635371	0	1
426	0	0.0694152	0	1
488	0	0.034207	0	1
69	0	0.0317996	0	1
77	0	0.207207	0	1
112	0	0.159393	0	1
144	0	0.389885	0	1
209	0	0.19939	0	1
267	0	0.177952	0	1
299	0	0.142337	0	1
337	0	0.173358	0	1
417	0	0.201855	0	1
422	0	0.176521	0	1
441	0	0.364538	0	1
446	0	0.209767	0	1
462	0	0.321886	0	1
142	0	0.325458	0	1
497	0	0.30283	0	1
10	1	0.244747	0	2
117	1	0.175506	0	2
277	1	0.174173	0	2
128	0	0.255963	0	1
475	0	0.450466	0	1
3	0	0.329137	0	1
403	0	0.512209	0	1
35	1	0.475158	0	2
131	0	0.505628	0	1
18	0	0.456729	0	1
197	1	0.447793	0	2
341	1	0.297847	0	2
496	1	0.240429	0	2
75	1	0.486377	0	2
388	0	0.298788	0	1
86	1	0.229161	0	2
399	0	0.329964	0	1
20	0	0.409159	0	1
27	0	0.50912	0	1
33	0	0.438436	0	1
196	0	0.51665	1	3
522	0	0.496895	1	3
460	0	0.421936	0	1
153	0	0.586752	1	3
220	0	0.494773	0	1
48	0	0.518465	1	3
140	0	0.666136	1	3
249	0	0.776228	1	3
65	1	0.512946	1	4
266	1	0.361866	0	2
58	1	0.61026	1	4
158	1	0.69397	1	4
199	1	0.56627	1	4
293	1	0.473002	1	4
202	1	0.676018	1	4
357	0	0.360732	0	1
517	0	0.393862	0	1
198	1	0.336048	0	2
509	0	0.449791	1	3
358	1	0.366517	0	2
320	0	0.450644	0	1
507	1	0.292513	0	2
361	1	0.895616	1	4
465	1	0.814359	1	4
146	1	0.783211	1	4
41	1	0.674292	1	4
270	0	0.539556	1	3
348	0	0.544241	1	3
464	0	0.556755	1	3
247	1	0.70971	1	4
284	1	0.799499	1	4
483	1	0.494882	1	4
102	1	0.584267	1	4
378	1	0.71547	1	4
349	1	0.502817	1	4
245	1	0.763703	1	4
368	1	0.866586	1	4
82	1	0.951741	1	4
7	0	0.293036	0	1
167	0	0.311107	0	1
236	0	0.241295	0	1
401	0	0.291799	0	1
413	0	0.446771	0	1
429	0	0.30251	0	1
163	1	0.307676	0	2
217	0	0.372425	0	1
169	1	0.288564	0	2
195	1	0.218581	0	2
375	1	0.338369	0	2
353	1	0.529069	1	4
419	0	0.571898	0	1
362	1	0.201481	0	2
126	0	0.332703	0	1
162	0	0.248791	0	1
186	0	0.31223	0	1
367	0	0.3445	0	1
190	0	0.486991	0	1
516	0	0.499865	1	3
360	1	0.505318	1	4
192	1	0.490779	1	4
406	0	0.288058	0	1
321	0	0.387965	0	1
346	0	0.629173	0	1
154	1	0.377101	0	2
336	1	0.597421	1	4
393	1	0.359653	0	2
78	0	0.228543	0	1
423	0	0.401176	0	1
31	0	0.732215	1	3
229	1	0.782798	1	4
448	0	0.93566	1	3
29	1	0.761992	1	4
434	1	0.671228	1	4
95	1	0.814868	1	4
397	0	0.629443	0	1
213	0	0.67348	1	3
183	1	0.669768	1	4
98	0	0.465505	0	1
168	0	0.40842	0	1
296	0	0.488184	0	1
342	0	0.365816	0	1
411	0	0.444956	0	1
424	0	0.423107	0	1
5	1	0.469012	0	2
19	0	0.326901	0	1
38	0	0.399045	0	1
501	0	0.398795	0	1
502	0	0.417231	0	1
396	1	0.343523	0	2
138	1	0.426984	0	2
64	1	0.361986	0	2
87	0	0.333085	0	1
251	0	0.426154	0	1
504	0	0.418395	0	1
405	1	0.363249	0	2
174	0	0.457137	0	1
80	0	0.455943	1	3
160	1	0.296199	0	2
34	1	0.211297	0	2
92	1	0.240749	0	2
493	0	0.385152	0	1
447	0	0.64721	1	3
149	1	0.713192	1	4
39	0	0.612693	1	3
307	0	0.515687	1	3
215	1	0.702679	1	4
340	1	0.549174	1	4
347	1	0.454246	1	4
88	0	0.46662	1	3
113	1	0.638963	1	4
79	1	0.764338	1	4
130	1	0.453488	1	4
370	1	0.523134	1	4
148	1	0.596975	1	4
513	1	0.0884154	0	2
147	0	0.472562	0	1
232	1	0.464797	1	4
387	0	0.178086	0	1
24	0	0.136455	0	1
314	0	0.164226	0	1
70	0	0.0933825	0	1
118	0	0.146086	0	1
374	0	0.0718803	0	1
106	0	0.087746	0	1
139	1	0.149798	0	2
76	0	0.631822	1	3
243	1	0.587743	1	4
30	0	0.0410476	0	1
46	0	0.0830784	0	1
63	0	0.111786	0	1
81	0	0.040099	0	1
156	0	0.042396	0	1
157	0	0.0704145	0	1
173	0	0.0907636	0	1
194	0	0.0905116	0	1
246	0	0.0980143	0	1
261	0	0.0572382	0	1
272	0	0.0839383	0	1
288	0	0.0531387	0	1
308	0	0.0330082	0	1
329	0	0.0521109	0	1
332	0	0.0348875	0	1
383	0	0.0450712	0	1
398	0	0.0423932	0	1
410	0	0.0417705	0	1
412	0	0.0508073	0	1
427	0	0.057816	0	1
451	0	0.0352939	0	1
455	0	0.0609628	0	1
461	0	0.0556838	0	1
467	0	0.0346726	0	1
468	0	0.103179	0	1
472	0	0.0637384	0	1
478	0	0.0613707	0	1
490	0	0.0676348	0	1
276	1	0.0637837	0	2
97	0	0.0603709	0	1
120	0	0.0437599	0	1
60	0	0.115895	0	1
47	1	0.0441215	0	2
59	1	0.151459	0	2
62	1	0.0384042	0	2
136	1	0.125842	0	2
439	0	0.262214	0	1
260	0	0.296027	0	1
473	1	0.256957	0	2
287	0	0.345966	0	1
32	0	0.201029	0	1
408	0	0.148002	0	1
185	0	0.16572	0	1
56	0	0.234329	0	1
150	0	0.167629	0	1
165	0	0.11562	0	1
166	0	0.140755	0	1
238	0	0.19353	0	1
366	0	0.0767015	0	1
407	0	0.202006	0	1
438	0	0.264286	0	1
482	0	0.100922	0	1
484	0	0.166961	0	1
487	0	0.0852826	0	1
512	0	0.105166	0	1
9	0	0.0870375	0	1
100	0	0.23277	0	1
211	1	0.080568	0	2
281	1	0.175628	0	2
458	1	0.182529	0	2
14	0	0.0882828	0	1
177	0	0.0534399	0	1
191	0	0.0998421	0	1
222	0	0.0470865	0	1
225	0	0.11709	0	1
269	0	0.0568222	0	1
312	0	0.0807925	0	1
382	0	0.179907	0	1
386	0	0.0855009	0	1
443	0	0.0819861	0	1
452	0	0.0987505	0	1
466	0	0.0942056	0	1
161	1	0.0884878	0	2
13	0	0.151782	0	1
170	0	0.0901545	0	1
248	0	0.0957908	0	1
122	0	0.272777	0	1
230	0	0.287251	0	1
263	0	0.194705	0	1
327	0	0.158713	0	1
457	0	0.287905	0	1
519	1	0.244282	0	2
291	0	0.262567	0	1
212	1	0.208182	0	2
178	0	0.19653	0	1
264	0	0.188803	0	1
420	0	0.365752	0	1
508	0	0.193154	0	1
280	1	0.117081	0	2
432	0	0.340714	0	1
489	0	0.191347	0	1
404	0	0.392123	0	1
385	1	0.156543	0	2
104	0	0.934446	1	3
205	1	0.904718	1	4
290	1	0.908671	1	4
145	1	0.818173	1	4
524	0	0.151782	0	1
365	0	0.021466	0	1
433	0	0.0324227	0	1
182	0	0.0657113	0	1
187	0	0.0852435	0	1
313	0	0.0672032	0	1
319	0	0.0375319	0	1
325	0	0.0427181	0	1
430	0	0.0478784	0	1
520	0	0.0603489	0	1
54	0	0.0634566	0	1
377	0	0.0449346	0	1
4	1	0.0338624	0	2
119	0	0.632227	0	1
52	1	0.264052	0	2
43	0	0.301464	0	1
90	0	0.37135	0	1
381	0	0.527229	0	1
498	0	0.521624	0	1
356	1	0.491178	1	4
492	1	0.538524	1	4
323	0	0.413624	0	1
93	1	0.582229	1	4
463	0	0.337439	0	1
480	0	0.516014	0	1
109	1	0.512589	1	4
152	1	0.527655	1	4

## Sheet: Fig 3a.
	RFS - 5-fold cross validation in training set / Training - test set validation
	Model 1 - Dermatoscopy only
		Training set
		fold	AUC	AUC_CI_low	AUC_CI_high
		1	0.745455	0.547593	0.943316
		2	0.717391	0.536824	0.897958
		3	0.926471	0.826347	1
		4	0.755882	0.59787	0.913894
		5	0.827586	0.692513	0.962659
		Set	AUC_60m	AUC_CI_low	AUC_CI_high
		Test	0.901099	0.810856	0.991342
	Model 2 - Breslow thickness/Histopathologic Ulceration
		Training set
		fold	AUC	AUC_CI_low	AUC_CI_high
		1	0.636364	0.414036	0.858691
		2	0.726449	0.54747	0.905429
		3	0.901961	0.7883	1
		4	0.708824	0.538925	0.878722
		5	0.708812	0.501791	0.915833
		Set	AUC_60m	AUC_CI_low	AUC_CI_high
		Test	0.865385	0.73413	0.996639
	Model 3 - Combination of dermatoscopy, Breslow thickness and ulceration
		Training set
		fold	AUC_60	AUC_60_LCL	AUC_60_UCL
		1	0.751515	0.549101	0.953929
		2	0.778986	0.602022	0.955949
		3	0.941176	0.847426	1
		4	0.776471	0.624895	0.928046
		5	0.823755	0.678592	0.968918
		Set	AUC_60m	AUC_CI_low	AUC_CI_high
		Test	0.923077	0.842913	1

## Sheet: Fig3b.
	DMFS - 5-fold cross validation in training set / Training - test set validation
	Model 1 - Dermatoscopy only
		Training set
		fold	AUC	AUC_CI_low	AUC_CI_high
		1	0.775	0.536148	1
		2	0.663043	0.439395	0.886692
		3	0.888235	0.749965	1
		4	0.7625	0.593423	0.931577
		5	0.835249	0.703696	0.966802
		Test set
			AUC	AUC_CI_Lower	AUC_CI_Upper
			0.860242	0.762015	0.958937
	Model 2 - Breslow thickness/Histopathologic Ulceration
		Training set
		fold	AUC	AUC_CI_low	AUC_CI_high
		1	0.583333	0.328353	0.838314
		2	0.785326	0.611413	0.959239
		3	0.858824	0.712037	1
		4	0.725	0.534285	0.915715
		5	0.720307	0.528317	0.912296
		Test set
			AUC	AUC_CI_Lower	AUC_CI_Upper
			0.810862	0.669532	0.952765
	Model 3 - Combination of dermatoscopy, Breslow thickness and ulceration
		Training set
		fold	AUC	AUC_CI_low	AUC_CI_high
		1	0.775	0.531722	1
		2	0.782609	0.583643	0.981574
		3	0.894118	0.77458	1
		4	0.7875	0.622806	0.952194
		5	0.8659	0.744524	0.987277
		Test set
			AUC	AUC_CI_Lower	AUC_CI_Upper
			0.869048	0.752489	0.985606

## Sheet: Fig.3c.
ID_train	Event_train	Time_train	Predicted_status_train (0 no metastasis, 1 metastasis)	lp	surv_60	risk_60
1	0	37	0	-1.26854	0.949053	0.0509467
2	0	60	0	-2.05891	0.984151	0.0158489
3	0	51	0	-2.65647	0.991249	0.00875067
4	0	36	0	-2.72816	0.990636	0.00936399
5	0	37	0	-1.48325	0.977377	0.022623
6	0	69	0	-2.33809	0.987989	0.0120114
7	0	60	1	-0.412004	0.909039	0.0909606
8	0	53	0	-1.46605	0.976989	0.0230109
9	0	108	0	-2.92105	0.992272	0.00772768
10	0	60	0	-1.62364	0.975613	0.0243866
11	0	108	1	0.26658	0.602719	0.397281
12	0	43	1	-0.35251	0.915749	0.0842507
13	0	42	0	-1.75947	0.935421	0.0645792
14	0	84	0	-1.47419	0.977174	0.0228264
15	0	36	0	-2.07256	0.952359	0.0476409
16	0	60	0	-1.72369	0.982169	0.0178314
17	0	45	0	-2.47822	0.967988	0.032012
18	0	95	0	-2.72417	0.990599	0.00940126
19	0	97	0	-2.92411	0.993297	0.00670275
20	0	36	0	-3.14418	0.992018	0.00798181
21	0	37	1	-0.60769	0.809602	0.190398
22	0	38	0	-1.75997	0.935452	0.0645479
23	0	48	0	-1.24967	0.959573	0.040427
24	0	108	0	-2.74571	0.991993	0.00800655
25	0	44	0	-2.5663	0.985819	0.0141812
26	0	60	0	-2.34397	0.98628	0.0137201
27	0	60	0	-1.67331	0.981256	0.0187442
28	0	42	0	-1.86154	0.971514	0.0284856
29	0	134	0	-1.74517	0.968056	0.0319442
30	0	40	0	-3.00828	0.995033	0.00496725
31	0	60	0	-1.46696	0.958027	0.0419732
32	1	6	0	-0.997123	0.963476	0.0365239
33	0	73	0	-1.58688	0.974712	0.0252881
34	0	38	0	-2.06213	0.951872	0.0481283
35	0	95	0	-1.70865	0.966888	0.0331123
36	0	60	0	-2.61123	0.989481	0.0105194
37	0	60	0	-0.913798	0.960366	0.0396339
38	0	61	0	-2.11522	0.98791	0.0120896
39	0	60	0	-1.6698	0.929581	0.0704193
40	0	60	0	-1.19354	0.962755	0.0372454
41	0	41	0	-1.39344	0.975278	0.0247224
42	0	63	0	-1.76368	0.935683	0.0643172
43	0	64	0	-1.46843	0.958087	0.0419127
44	0	132	0	-1.66083	0.965294	0.034706
45	0	60	0	-1.20783	0.963273	0.0367268
46	0	65	0	-1.32877	0.973648	0.0263519
47	1	17	0	-1.30402	0.966584	0.0334158
48	0	108	0	-1.57427	0.962216	0.0377838
49	0	71	1	-0.968575	0.863097	0.136903
50	0	36	0	-1.70748	0.966849	0.0331506
51	0	145	0	-1.35078	0.963389	0.0366114
52	0	48	0	-2.05544	0.987171	0.0128295
53	0	63	0	-1.61336	0.980109	0.0198907
54	0	48	0	-2.54355	0.969982	0.0300184
55	0	50	0	-1.21739	0.963616	0.0363839
56	0	86	0	-2.63914	0.991097	0.00890292
57	0	57	0	-1.75235	0.975346	0.0246539
58	0	43	0	-1.69379	0.973879	0.0261209
59	0	37	0	-2.45037	0.991338	0.00866178
60	1	59	1	-0.87018	0.925075	0.0749246
61	0	36	0	-2.36345	0.982657	0.0173426
62	0	42	0	-1.69706	0.981692	0.0183081
63	0	60	0	-3.10901	0.982835	0.0171655
64	0	92	0	-1.47251	0.967516	0.0324845
65	0	56	0	-1.30568	0.966639	0.033361
66	0	78	0	-1.48896	0.916222	0.083778
67	0	124	0	-3.49424	0.996942	0.00305832
68	0	96	0	-2.23568	0.984723	0.0152772
69	0	124	0	-2.59767	0.97154	0.0284597
70	0	36	0	-3.1546	0.983593	0.0164068
71	0	48	0	-2.25995	0.989531	0.0104691
72	0	62	1	-0.827663	0.844081	0.155919
73	0	56	0	-1.69055	0.981573	0.0184267
74	0	48	0	-2.52503	0.969429	0.0305708
75	0	36	0	-1.51388	0.959912	0.0400882
76	0	39	1	-0.712965	0.912891	0.0871091
77	0	40	0	-1.87792	0.984697	0.0153025
78	0	38	1	-0.355282	0.903994	0.096006
79	0	82	0	-1.09347	0.939606	0.060394
80	0	40	0	-1.66365	0.973091	0.0269093
81	0	122	0	-1.1306	0.941742	0.0582584
82	0	113	1	-0.0619688	0.694528	0.305472
83	0	36	0	-0.982607	0.954211	0.0457888
84	1	16	1	0.232053	0.613165	0.386835
85	0	58	0	-1.3424	0.967822	0.0321781
86	1	18	0	-1.52076	0.978201	0.0217992
87	0	38	0	-2.2495	0.984931	0.0150691
88	0	57	0	-1.25907	0.948581	0.0514189
89	1	6	1	0.116804	0.892842	0.107158
90	0	60	0	-1.43921	0.976371	0.0236294
91	0	34	0	-0.881692	0.949474	0.0505259
92	0	92	0	-1.16129	0.943452	0.0565481
93	0	59	0	-1.39937	0.965094	0.0349059
94	0	42	0	-1.96967	0.982685	0.0173155
95	0	60	0	-0.658061	0.928147	0.071853
96	0	62	0	-1.18865	0.957085	0.0429154
97	0	63	0	-0.51508	0.91757	0.08243
98	0	67	0	-2.76071	0.98831	0.0116904
99	0	49	0	-1.10843	0.96726	0.0327404
100	0	36	0	-2.20343	0.958079	0.0419213
101	0	44	0	-1.13944	0.954969	0.0450308
102	0	103	0	-3.25799	0.985193	0.0148072
103	0	71	1	-0.641245	0.815264	0.184736
104	0	132	0	-1.30379	0.966577	0.0334232
105	0	76	0	-1.61	0.963518	0.0364821
106	0	59	0	-1.1204	0.954124	0.0458762
107	0	134	0	-1.95131	0.982367	0.0176334
108	0	74	0	-2.31191	0.990058	0.00994162
109	0	74	0	-1.71977	0.932895	0.0671047
110	0	132	0	-1.27326	0.897125	0.102875
111	0	62	1	-0.637001	0.814556	0.185444
112	0	48	0	-0.613845	0.925024	0.0749765
113	0	40	0	-1.47824	0.967698	0.0323018
114	0	115	1	0.375392	0.762901	0.237099
115	0	61	0	-1.13121	0.954606	0.0453943
116	0	36	0	-2.11624	0.982801	0.0171987
117	1	45	0	-1.44746	0.970984	0.0290157
118	0	36	0	-1.83566	0.970779	0.0292212
119	0	91	1	-0.618967	0.811521	0.188479
120	0	66	0	-0.989013	0.963184	0.0368157
121	0	95	1	0.320564	0.841536	0.158464
122	0	60	0	-0.608881	0.924665	0.0753352
123	0	120	0	-1.85841	0.971427	0.0285734
124	0	49	0	-1.84839	0.980474	0.0195261
125	1	36	0	-1.5298	0.919436	0.0805643
126	1	57	1	-0.548091	0.94337	0.0566299
127	0	37	0	-1.9397	0.945777	0.0542234
128	0	37	1	-0.761846	0.916869	0.0831313
129	0	52	1	0.310985	0.871415	0.128585
130	0	36	0	-0.820993	0.956597	0.0434034
131	0	41	1	0.313611	0.842542	0.157458
132	0	56	0	-2.05263	0.981682	0.0183179
133	0	114	1	-0.63012	0.905733	0.0942672
134	1	25	0	-1.26364	0.965231	0.0347685
135	0	84	0	-1.08386	0.958528	0.0414722
136	0	36	0	-1.93604	0.97944	0.0205596
137	0	50	0	-1.67677	0.98132	0.01868
138	0	54	0	-2.17798	0.988642	0.0113583
139	0	60	1	-0.0724621	0.841196	0.158804
140	0	68	0	-1.07941	0.938777	0.0612229
141	0	48	0	-0.853564	0.948071	0.0519292
142	0	34	1	-0.651777	0.948802	0.0511978
143	0	50	1	-0.334497	0.930365	0.0696349
144	0	58	1	0.420191	0.857684	0.142316
145	0	46	0	-0.494653	0.915942	0.0840575
146	0	27	0	-0.72273	0.94103	0.0589697
147	0	68	0	-1.30864	0.951006	0.0489937
148	0	50	0	-1.31928	0.9734	0.0265999
149	0	110	0	-3.92536	0.992375	0.00762454
150	0	95	1	0.534866	0.515765	0.484235
151	0	40	0	-3.14979	0.983515	0.0164853
152	0	65	0	-0.808037	0.937836	0.0621642
153	0	74	1	-0.898226	0.92707	0.07293
154	0	56	0	-0.431042	0.910676	0.0893243
155	0	228	0	-0.809806	0.937942	0.0620578
156	0	37	0	-1.08694	0.96656	0.0334395
157	1	8	0	-2.3537	0.963821	0.0361793
158	1	12	1	-0.916701	0.856358	0.143642
159	1	12	0	-2.07729	0.987446	0.0125539
160	1	72	1	0.823374	0.720341	0.279659
161	0	41	0	-3.43335	0.987559	0.0124405
162	1	6	1	0.654718	0.785858	0.214142
163	0	36	1	0.0445159	0.860241	0.139759
164	0	55	1	-0.911208	0.927976	0.072024
165	0	36	0	-2.38681	0.988556	0.0114436
166	0	60	1	0.0755144	0.818313	0.181687
167	1	11	0	-1.47804	0.971846	0.0281543
168	1	8	0	-1.18627	0.956984	0.0430156
169	0	36	1	0.029942	0.901302	0.0986985
170	0	54	1	-0.339888	0.758757	0.241243
171	1	11	1	-0.201415	0.902697	0.0973028
172	0	72	0	-0.893287	0.950042	0.0499583
173	0	40	0	-1.46072	0.971361	0.0286392
174	0	50	0	-1.5517	0.969951	0.0300486
175	0	68	0	-1.21138	0.958029	0.0419714
176	0	77	0	-0.432323	0.910785	0.0892151
177	0	40	1	-0.636678	0.948044	0.0519561
178	1	13	1	-1.23648	0.893484	0.106516
179	0	63	1	-0.851552	0.923722	0.0762782
180	0	86	0	-0.62734	0.92599	0.0740096
181	1	25	1	0.771305	0.73243	0.26757
182	0	31	1	0.171058	0.842947	0.157053
183	0	70	1	0.177662	0.886515	0.113485
184	0	113	0	-1.82309	0.939278	0.060722
185	0	132	0	-1.56398	0.970313	0.0296874
186	0	94	0	-1.67148	0.981222	0.0187781
187	0	46	0	-1.33801	0.95239	0.0476104
188	0	141	0	-1.17352	0.956445	0.0435552
189	0	36	0	-1.52831	0.973207	0.0267929
190	0	54	0	-2.64273	0.972777	0.0272228
191	0	71	1	-0.467693	0.890054	0.109946
192	0	119	0	-0.992975	0.954673	0.0453274
193	0	37	1	-0.701807	0.951239	0.0487613
194	0	50	1	-0.141406	0.850944	0.149056
195	0	113	0	-1.56109	0.921818	0.0781817
196	0	52	0	-1.1822	0.944589	0.055411
197	0	60	1	-0.881766	0.85165	0.14835
198	1	12	1	-0.775344	0.954616	0.0453839
199	0	85	0	-2.42974	0.991158	0.00884155
200	0	107	0	-2.61088	0.971909	0.0280913
201	1	13	1	-1.00255	0.934051	0.0659492
202	1	27	1	0.239208	0.832851	0.167149
203	0	66	1	-1.18507	0.888192	0.111808
204	1	5	1	1.62829	0.598189	0.401811
205	0	87	0	-2.03576	0.983783	0.016217
206	0	56	1	-0.1371	0.915825	0.0841745
207	1	16	1	-0.218311	0.922128	0.0778717
208	0	40	1	0.0641027	0.875028	0.124972
209	1	4	1	-0.0809499	0.890944	0.109056
210	0	82	1	-1.09522	0.878346	0.121654
211	0	86	1	-0.0863558	0.843206	0.156794
212	1	29	1	0.135773	0.808185	0.191815
213	0	50	0	-2.40608	0.990948	0.00905221
214	0	108	0	-0.982949	0.954226	0.0457735
215	0	97	0	-1.11114	0.940631	0.0593685
216	0	83	0	-2.02894	0.986828	0.0131718
217	0	72	0	-0.920399	0.960622	0.0393783
218	1	11	1	-0.82394	0.921672	0.0783279
219	0	55	0	-1.7309	0.933613	0.0663873
220	0	45	1	-0.177403	0.886404	0.113596
221	0	94	0	-2.5662	0.985817	0.0141826
222	0	125	1	-0.378988	0.906134	0.0938658
223	1	77	1	-0.483253	0.939693	0.0603066
224	0	146	0	-1.45244	0.971126	0.0288738
225	0	61	0	-0.788297	0.955187	0.0448132
226	0	113	0	-1.19612	0.945333	0.0546667
227	0	36	0	-0.697638	0.939578	0.0604219
228	0	37	0	-1.55527	0.92138	0.0786195
229	0	73	0	-1.38289	0.964525	0.0354752
230	1	18	1	1.43271	0.591773	0.408227
231	1	59	1	-0.475632	0.925134	0.0748661
232	0	33	0	-1.32239	0.901807	0.0981934
233	1	6	1	0.19682	0.839197	0.160803
234	1	36	1	0.875256	0.707867	0.292133
235	0	101	0	-1.32186	0.901757	0.0982427
236	0	39	1	-0.202586	0.889066	0.110934
237	0	104	1	-0.285081	0.869525	0.130475
238	0	36	1	-0.401103	0.882945	0.117055
239	0	55	1	0.121046	0.892412	0.107588
240	0	48	1	0.0707837	0.6595	0.3405
241	0	77	0	-1.56159	0.921856	0.0781441
242	1	1	1	-0.982534	0.864861	0.135139
243	1	19	1	0.0215086	0.826985	0.173015
244	1	6	1	-0.142613	0.714423	0.285577
245	0	95	0	-1.69222	0.931087	0.0689132
246	0	120	1	0.551786	0.839364	0.160636
247	0	38	1	-0.156655	0.884166	0.115834
248	1	13	1	0.995285	0.677354	0.322646
249	0	62	0	-0.759548	0.9431	0.0568999
250	0	101	1	-0.676838	0.909835	0.0901646
251	1	24	1	-0.38525	0.768104	0.231896
252	1	24	1	1.26829	0.599387	0.400613
253	1	17	1	0.833065	0.652009	0.347991
254	1	29	0	-0.9259	0.944552	0.0554481
255	0	74	1	0.169841	0.862097	0.137903
256	1	54	0	-1.56436	0.974144	0.0258564
257	1	96	0	-2.95691	0.980043	0.019957
258	1	5	1	0.247346	0.851849	0.148151
259	1	36	1	-0.395679	0.907614	0.0923863
260	1	36	1	0.290652	0.873832	0.126168
261	1	84	1	-0.592306	0.902284	0.0977165
262	0	55	1	-0.133071	0.849795	0.150205
263	1	15	1	1.57465	0.61446	0.38554
264	0	88	1	-0.820967	0.921448	0.0785517
265	0	55	1	-0.627588	0.905506	0.0944944
266	1	84	0	-0.825649	0.938887	0.0611128
267	0	60	1	0.00469268	0.829609	0.170391
268	1	5	1	0.853934	0.402141	0.597859
269	0	98	0	-1.0241	0.956031	0.0439692
270	0	91	1	0.715507	0.813621	0.186379
271	0	36	1	0.639614	0.825979	0.174021
272	0	120	1	-0.152347	0.85244	0.14756
273	0	63	1	0.74721	0.76772	0.23228
274	0	41	1	2.05006	0.326751	0.673249
275	1	12	1	0.411736	0.804655	0.195345
276	0	59	0	-0.600388	0.924047	0.0759527
277	0	36	1	0.738971	0.769387	0.230613
278	1	52	1	0.063623	0.820255	0.179745
279	0	40	0	-1.69665	0.977311	0.0226892
280	0	41	1	1.46223	0.187554	0.812446
281	0	77	0	-1.10927	0.940524	0.0594764
282	1	39	1	-0.160574	0.884592	0.115408
283	1	13	1	-0.139349	0.896799	0.103201
284	1	29	1	-0.619174	0.904746	0.0952536
285	1	24	1	-0.609129	0.946632	0.0533679
286	1	24	0	-1.09423	0.958947	0.0410533
287	0	46	1	1.10741	0.736959	0.263041
288	1	14	1	1.07436	0.321229	0.678771
289	0	74	0	-1.35297	0.95308	0.04692
290	0	102	0	-2.15666	0.985616	0.0143837
291	1	5	1	-0.246115	0.89353	0.10647
292	1	10	1	1.62646	0.528983	0.471017
293	0	84	1	0.952046	0.617711	0.382289
294	0	114	0	-0.508178	0.927442	0.072558
295	1	36	1	-0.487368	0.78803	0.21197
296	1	57	1	0.262917	0.849708	0.150292
297	1	1	1	1.4284	0.593109	0.406891
298	0	60	1	-0.43749	0.778488	0.221512
299	0	46	1	-0.0168736	0.682948	0.317052
300	1	8	1	1.05239	0.698612	0.301388
301	0	60	1	1.2103	0.712981	0.287019
302	0	53	1	-0.209524	0.903444	0.0965562
303	1	19	1	-1.26403	0.896223	0.103777
304	0	36	1	0.899656	0.780387	0.219613
305	1	13	1	0.00486816	0.829582	0.170418
306	0	48	1	1.06467	0.74643	0.25357

## Sheet: Fig.3d.
ID_test	Event_test	Time_test	PredictedStatus_test (0 no metastasis, 1 metastasis)	lp	surv_60	risk_60
307	0	37	0	-2.01261	0.977514	0.0224864
308	0	39	0	-2.21354	0.981569	0.0184311
309	0	43	0	-1.94898	0.976054	0.0239456
310	0	92	1	-0.948183	0.936191	0.063809
311	0	82	0	-1.70798	0.969628	0.0303715
312	0	54	1	-0.802808	0.926582	0.0734182
313	0	37	0	-1.70276	0.969472	0.030528
314	0	110	0	-2.92395	0.990899	0.00910068
315	0	72	0	-1.99979	0.977227	0.0227731
316	0	70	0	-1.61866	0.966838	0.0331616
317	0	84	0	-1.74338	0.970669	0.0293308
318	0	38	0	-2.26255	0.982443	0.0175573
319	0	110	0	-2.15698	0.980507	0.0194931
320	0	36	1	-0.525092	0.904238	0.0957617
321	1	60	1	-0.13298	0.861577	0.138423
322	0	48	0	-1.68871	0.969047	0.0309531
323	0	52	0	-2.72068	0.988859	0.0111405
324	0	101	1	-0.957418	0.936759	0.0632414
325	0	105	0	-1.63787	0.967459	0.032541
326	0	84	0	-1.21556	0.950786	0.0492141
327	0	113	0	-2.64623	0.988004	0.0119964
328	0	108	1	0.122099	0.825074	0.174926
329	0	35	0	-1.73439	0.970408	0.0295916
330	0	132	0	-1.19457	0.949769	0.0502314
331	0	59	0	-1.17689	0.948896	0.0511038
332	0	45	0	-2.3311	0.983596	0.0164036
333	0	50	0	-1.5085	0.963049	0.0369511
334	1	14	1	-0.837262	0.928978	0.0710222
335	0	52	0	-2.04404	0.978202	0.0217982
336	0	115	0	-2.36985	0.984215	0.0157851
337	0	49	0	-2.36851	0.984194	0.0158061
338	0	84	0	-2.05723	0.978484	0.0215155
339	0	97	0	-2.6838	0.988443	0.0115566
340	0	45	0	-1.80196	0.972315	0.0276853
341	0	64	0	-1.66658	0.968365	0.0316347
342	0	36	0	-1.64841	0.967795	0.0322054
343	0	70	0	-2.38796	0.984496	0.0155041
344	0	42	0	-1.65024	0.967853	0.0321473
345	0	36	1	-0.27892	0.879186	0.120814
346	0	60	0	-1.26531	0.953118	0.0468825
347	0	39	0	-2.27184	0.982604	0.0173964
348	0	104	1	-0.497242	0.901671	0.0983287
349	0	65	0	-1.15095	0.947589	0.0524108
350	0	48	1	-0.853272	0.930065	0.0699346
351	0	48	1	-0.252275	0.876134	0.123866
352	1	44	1	0.453288	0.765079	0.234921
353	0	45	0	-1.46871	0.961578	0.038422
354	0	104	0	-2.37807	0.984343	0.0156569
355	0	108	0	-1.12316	0.946153	0.0538473
356	0	120	0	-1.21655	0.950834	0.0491664
357	0	46	1	0.107938	0.827308	0.172692
358	0	58	0	-1.55653	0.964751	0.0352493
359	0	87	0	-1.63209	0.967274	0.0327265
360	0	47	1	-0.151195	0.863897	0.136103
361	0	85	1	-0.56075	0.907432	0.0925675
362	0	40	1	-0.0858499	0.855405	0.144595
363	1	5	1	0.583847	0.737034	0.262966
364	0	36	0	-1.25523	0.952654	0.0473457
365	0	57	1	-0.660106	0.915808	0.0841924
366	0	48	0	-1.85097	0.973621	0.0263788
367	1	18	1	0.431149	0.769578	0.230422
368	0	99	1	-0.46822	0.898927	0.101073
369	0	62	1	0.217885	0.80928	0.19072
370	1	37	1	1.20344	0.567242	0.432758
371	1	6	1	1.2446	0.553887	0.446113
372	1	7	1	-0.816179	0.927521	0.0724793
373	1	19	1	-0.513667	0.903193	0.0968069
374	1	18	1	-0.972846	0.937696	0.062304
375	1	44	1	0.260428	0.801871	0.198129
376	0	40	0	-1.35029	0.956853	0.0431467
377	0	36	0	-2.12946	0.979969	0.0200314
378	0	39	0	-1.15919	0.948008	0.0519921
379	1	15	1	-0.820017	0.927788	0.0722119
380	1	12	1	0.867252	0.666915	0.333085
381	0	128	1	0.443943	0.766987	0.233013

## Sheet: Fig.4a
ID_train	lp	surv_60	risk_60	Event	Time	Predicted_Status (0 no metastasis, 1 metastasis)	Stage low/high risk (0 IB/IIA, 1 IIB/IIC)	Risk (1 AJCC low risk/predicted non meta, 2 AJCC high risk/ predicted non meta, 3 AJCC low risk/predicted meta, 4 AJCC high risk/predicted meta)
1	-1.26854	0.949053	0.0509467	0	37	0	0	0
2	-2.05891	0.984151	0.0158489	0	60	0	0	0
3	-2.65647	0.991249	0.00875067	0	51	0	0	0
4	-2.72816	0.990636	0.00936399	0	36	0	0	0
5	-1.48325	0.977377	0.022623	0	37	0	0	0
6	-2.33809	0.987989	0.0120114	0	69	0	0	0
8	-1.46605	0.976989	0.0230109	0	53	0	0	0
9	-2.92105	0.992272	0.00772768	0	108	0	0	0
10	-1.62364	0.975613	0.0243866	0	60	0	0	0
13	-1.75947	0.935421	0.0645792	0	42	0	0	0
14	-1.47419	0.977174	0.0228264	0	84	0	0	0
15	-2.07256	0.952359	0.0476409	0	36	0	0	0
16	-1.72369	0.982169	0.0178314	0	60	0	0	0
17	-2.47822	0.967988	0.032012	0	45	0	0	0
18	-2.72417	0.990599	0.00940126	0	95	0	0	0
19	-2.92411	0.993297	0.00670275	0	97	0	0	0
20	-3.14418	0.992018	0.00798181	0	36	0	0	0
22	-1.75997	0.935452	0.0645479	0	38	0	0	0
23	-1.24967	0.959573	0.040427	0	48	0	0	0
24	-2.74571	0.991993	0.00800655	0	108	0	0	0
25	-2.5663	0.985819	0.0141812	0	44	0	0	0
26	-2.34397	0.98628	0.0137201	0	60	0	0	0
27	-1.67331	0.981256	0.0187442	0	60	0	0	0
28	-1.86154	0.971514	0.0284856	0	42	0	0	0
29	-1.74517	0.968056	0.0319442	0	134	0	0	0
30	-3.00828	0.995033	0.00496725	0	40	0	0	0
31	-1.46696	0.958027	0.0419732	0	60	0	0	0
33	-1.58688	0.974712	0.0252881	0	73	0	0	0
34	-2.06213	0.951872	0.0481283	0	38	0	0	0
35	-1.70865	0.966888	0.0331123	0	95	0	0	0
36	-2.61123	0.989481	0.0105194	0	60	0	0	0
37	-0.913798	0.960366	0.0396339	0	60	0	0	0
38	-2.11522	0.98791	0.0120896	0	61	0	0	0
39	-1.6698	0.929581	0.0704193	0	60	0	0	0
40	-1.19354	0.962755	0.0372454	0	60	0	0	0
41	-1.39344	0.975278	0.0247224	0	41	0	0	0
42	-1.76368	0.935683	0.0643172	0	63	0	0	0
43	-1.46843	0.958087	0.0419127	0	64	0	0	0
44	-1.66083	0.965294	0.034706	0	132	0	0	0
45	-1.20783	0.963273	0.0367268	0	60	0	0	0
46	-1.32877	0.973648	0.0263519	0	65	0	0	0
48	-1.57427	0.962216	0.0377838	0	108	0	0	0
50	-1.70748	0.966849	0.0331506	0	36	0	0	0
51	-1.35078	0.963389	0.0366114	0	145	0	0	0
52	-2.05544	0.987171	0.0128295	0	48	0	0	0
53	-1.61336	0.980109	0.0198907	0	63	0	0	0
54	-2.54355	0.969982	0.0300184	0	48	0	0	0
55	-1.21739	0.963616	0.0363839	0	50	0	0	0
56	-2.63914	0.991097	0.00890292	0	86	0	0	0
57	-1.75235	0.975346	0.0246539	0	57	0	0	0
58	-1.69379	0.973879	0.0261209	0	43	0	0	0
59	-2.45037	0.991338	0.00866178	0	37	0	0	0
61	-2.36345	0.982657	0.0173426	0	36	0	0	0
62	-1.69706	0.981692	0.0183081	0	42	0	0	0
63	-3.10901	0.982835	0.0171655	0	60	0	0	0
64	-1.47251	0.967516	0.0324845	0	92	0	0	0
65	-1.30568	0.966639	0.033361	0	56	0	0	0
66	-1.48896	0.916222	0.083778	0	78	0	0	0
67	-3.49424	0.996942	0.00305832	0	124	0	0	0
68	-2.23568	0.984723	0.0152772	0	96	0	0	0
69	-2.59767	0.97154	0.0284597	0	124	0	0	0
70	-3.1546	0.983593	0.0164068	0	36	0	0	0
71	-2.25995	0.989531	0.0104691	0	48	0	0	0
73	-1.69055	0.981573	0.0184267	0	56	0	0	0
74	-2.52503	0.969429	0.0305708	0	48	0	0	0
75	-1.51388	0.959912	0.0400882	0	36	0	0	0
77	-1.87792	0.984697	0.0153025	0	40	0	0	0
79	-1.09347	0.939606	0.060394	0	82	0	0	0
80	-1.66365	0.973091	0.0269093	0	40	0	0	0
81	-1.1306	0.941742	0.0582584	0	122	0	0	0
83	-0.982607	0.954211	0.0457888	0	36	0	0	0
85	-1.3424	0.967822	0.0321781	0	58	0	0	0
87	-2.2495	0.984931	0.0150691	0	38	0	0	0
88	-1.25907	0.948581	0.0514189	0	57	0	0	0
90	-1.43921	0.976371	0.0236294	0	60	0	0	0
91	-0.881692	0.949474	0.0505259	0	34	0	0	0
92	-1.16129	0.943452	0.0565481	0	92	0	0	0
93	-1.39937	0.965094	0.0349059	0	59	0	0	0
94	-1.96967	0.982685	0.0173155	0	42	0	0	0
95	-0.658061	0.928147	0.071853	0	60	0	0	0
96	-1.18865	0.957085	0.0429154	0	62	0	0	0
97	-0.51508	0.91757	0.08243	0	63	0	0	0
98	-2.76071	0.98831	0.0116904	0	67	0	0	0
99	-1.10843	0.96726	0.0327404	0	49	0	0	0
100	-2.20343	0.958079	0.0419213	0	36	0	0	0
101	-1.13944	0.954969	0.0450308	0	44	0	0	0
102	-3.25799	0.985193	0.0148072	0	103	0	0	0
104	-1.30379	0.966577	0.0334232	0	132	0	0	0
105	-1.61	0.963518	0.0364821	0	76	0	0	0
106	-1.1204	0.954124	0.0458762	0	59	0	0	0
107	-1.95131	0.982367	0.0176334	0	134	0	0	0
108	-2.31191	0.990058	0.00994162	0	74	0	0	0
109	-1.71977	0.932895	0.0671047	0	74	0	0	0
110	-1.27326	0.897125	0.102875	0	132	0	0	0
112	-0.613845	0.925024	0.0749765	0	48	0	0	0
113	-1.47824	0.967698	0.0323018	0	40	0	0	0
115	-1.13121	0.954606	0.0453943	0	61	0	0	0
116	-2.11624	0.982801	0.0171987	0	36	0	0	0
118	-1.83566	0.970779	0.0292212	0	36	0	0	0
120	-0.989013	0.963184	0.0368157	0	66	0	0	0
122	-0.608881	0.924665	0.0753352	0	60	0	0	0
123	-1.85841	0.971427	0.0285734	0	120	0	0	0
124	-1.84839	0.980474	0.0195261	0	49	0	0	0
127	-1.9397	0.945777	0.0542234	0	37	0	0	0
130	-0.820993	0.956597	0.0434034	0	36	0	0	0
132	-2.05263	0.981682	0.0183179	0	56	0	0	0
135	-1.08386	0.958528	0.0414722	0	84	0	0	0
136	-1.93604	0.97944	0.0205596	0	36	0	0	0
137	-1.67677	0.98132	0.01868	0	50	0	0	0
138	-2.17798	0.988642	0.0113583	0	54	0	0	0
140	-1.07941	0.938777	0.0612229	0	68	0	0	0
141	-0.853564	0.948071	0.0519292	0	48	0	0	0
145	-0.494653	0.915942	0.0840575	0	46	0	0	0
146	-0.72273	0.94103	0.0589697	0	27	0	0	0
147	-1.30864	0.951006	0.0489937	0	68	0	0	0
148	-1.31928	0.9734	0.0265999	0	50	0	0	0
149	-3.92536	0.992375	0.00762454	0	110	0	0	0
151	-3.14979	0.983515	0.0164853	0	40	0	0	0
152	-0.808037	0.937836	0.0621642	0	65	0	0	0
154	-0.431042	0.910676	0.0893243	0	56	0	0	0
155	-0.809806	0.937942	0.0620578	0	228	0	0	0
156	-1.08694	0.96656	0.0334395	0	37	0	0	0
161	-3.43335	0.987559	0.0124405	0	41	0	0	0
165	-2.38681	0.988556	0.0114436	0	36	0	0	0
172	-0.893287	0.950042	0.0499583	0	72	0	0	0
173	-1.46072	0.971361	0.0286392	0	40	0	0	0
174	-1.5517	0.969951	0.0300486	0	50	0	0	0
175	-1.21138	0.958029	0.0419714	0	68	0	0	0
176	-0.432323	0.910785	0.0892151	0	77	0	0	0
180	-0.62734	0.92599	0.0740096	0	86	0	0	0
184	-1.82309	0.939278	0.060722	0	113	0	0	0
185	-1.56398	0.970313	0.0296874	0	132	0	0	0
186	-1.67148	0.981222	0.0187781	0	94	0	0	0
187	-1.33801	0.95239	0.0476104	0	46	0	0	0
188	-1.17352	0.956445	0.0435552	0	141	0	0	0
189	-1.52831	0.973207	0.0267929	0	36	0	0	0
190	-2.64273	0.972777	0.0272228	0	54	0	0	0
192	-0.992975	0.954673	0.0453274	0	119	0	0	0
195	-1.56109	0.921818	0.0781817	0	113	0	0	0
196	-1.1822	0.944589	0.055411	0	52	0	0	0
199	-2.42974	0.991158	0.00884155	0	85	0	0	0
200	-2.61088	0.971909	0.0280913	0	107	0	0	0
205	-2.03576	0.983783	0.016217	0	87	0	0	0
213	-2.40608	0.990948	0.00905221	0	50	0	0	0
214	-0.982949	0.954226	0.0457735	0	108	0	0	0
215	-1.11114	0.940631	0.0593685	0	97	0	0	0
216	-2.02894	0.986828	0.0131718	0	83	0	0	0
217	-0.920399	0.960622	0.0393783	0	72	0	0	0
219	-1.7309	0.933613	0.0663873	0	55	0	0	0
221	-2.5662	0.985817	0.0141826	0	94	0	0	0
224	-1.45244	0.971126	0.0288738	0	146	0	0	0
225	-0.788297	0.955187	0.0448132	0	61	0	0	0
226	-1.19612	0.945333	0.0546667	0	113	0	0	0
227	-0.697638	0.939578	0.0604219	0	36	0	0	0
228	-1.55527	0.92138	0.0786195	0	37	0	0	0
229	-1.38289	0.964525	0.0354752	0	73	0	0	0
232	-1.32239	0.901807	0.0981934	0	33	0	0	0
235	-1.32186	0.901757	0.0982427	0	101	0	0	0
241	-1.56159	0.921856	0.0781441	0	77	0	1	1
245	-1.69222	0.931087	0.0689132	0	95	0	1	1
249	-0.759548	0.9431	0.0568999	0	62	0	1	1
269	-1.0241	0.956031	0.0439692	0	98	0	1	1
276	-0.600388	0.924047	0.0759527	0	59	0	1	1
279	-1.69665	0.977311	0.0226892	0	40	0	1	1
281	-1.10927	0.940524	0.0594764	0	77	0	1	1
289	-1.35297	0.95308	0.04692	0	74	0	1	1
290	-2.15666	0.985616	0.0143837	0	102	0	1	1
294	-0.508178	0.927442	0.072558	0	114	0	1	1
32	-0.997123	0.963476	0.0365239	1	6	0	0	0
47	-1.30402	0.966584	0.0334158	1	17	0	0	0
86	-1.52076	0.978201	0.0217992	1	18	0	0	0
117	-1.44746	0.970984	0.0290157	1	45	0	0	0
125	-1.5298	0.919436	0.0805643	1	36	0	0	0
134	-1.26364	0.965231	0.0347685	1	25	0	0	0
157	-2.3537	0.963821	0.0361793	1	8	0	0	0
159	-2.07729	0.987446	0.0125539	1	12	0	0	0
167	-1.47804	0.971846	0.0281543	1	11	0	0	0
168	-1.18627	0.956984	0.0430156	1	8	0	0	0
254	-0.9259	0.944552	0.0554481	1	29	0	1	1
256	-1.56436	0.974144	0.0258564	1	54	0	1	1
257	-2.95691	0.980043	0.019957	1	96	0	1	1
266	-0.825649	0.938887	0.0611128	1	84	0	1	1
286	-1.09423	0.958947	0.0410533	1	24	0	1	1
7	-0.412004	0.909039	0.0909606	0	60	1	0	2
11	0.26658	0.602719	0.397281	0	108	1	0	2
12	-0.35251	0.915749	0.0842507	0	43	1	0	2
21	-0.60769	0.809602	0.190398	0	37	1	0	2
49	-0.968575	0.863097	0.136903	0	71	1	0	2
72	-0.827663	0.844081	0.155919	0	62	1	0	2
76	-0.712965	0.912891	0.0871091	0	39	1	0	2
78	-0.355282	0.903994	0.096006	0	38	1	0	2
82	-0.0619688	0.694528	0.305472	0	113	1	0	2
103	-0.641245	0.815264	0.184736	0	71	1	0	2
111	-0.637001	0.814556	0.185444	0	62	1	0	2
114	0.375392	0.762901	0.237099	0	115	1	0	2
119	-0.618967	0.811521	0.188479	0	91	1	0	2
121	0.320564	0.841536	0.158464	0	95	1	0	2
128	-0.761846	0.916869	0.0831313	0	37	1	0	2
129	0.310985	0.871415	0.128585	0	52	1	0	2
131	0.313611	0.842542	0.157458	0	41	1	0	2
133	-0.63012	0.905733	0.0942672	0	114	1	0	2
139	-0.0724621	0.841196	0.158804	0	60	1	0	2
142	-0.651777	0.948802	0.0511978	0	34	1	0	2
143	-0.334497	0.930365	0.0696349	0	50	1	0	2
144	0.420191	0.857684	0.142316	0	58	1	0	2
150	0.534866	0.515765	0.484235	0	95	1	0	2
153	-0.898226	0.92707	0.07293	0	74	1	0	2
163	0.0445159	0.860241	0.139759	0	36	1	0	2
164	-0.911208	0.927976	0.072024	0	55	1	0	2
166	0.0755144	0.818313	0.181687	0	60	1	0	2
169	0.029942	0.901302	0.0986985	0	36	1	0	2
170	-0.339888	0.758757	0.241243	0	54	1	0	2
177	-0.636678	0.948044	0.0519561	0	40	1	0	2
179	-0.851552	0.923722	0.0762782	0	63	1	0	2
182	0.171058	0.842947	0.157053	0	31	1	0	2
183	0.177662	0.886515	0.113485	0	70	1	0	2
191	-0.467693	0.890054	0.109946	0	71	1	0	2
193	-0.701807	0.951239	0.0487613	0	37	1	0	2
194	-0.141406	0.850944	0.149056	0	50	1	0	2
197	-0.881766	0.85165	0.14835	0	60	1	0	2
203	-1.18507	0.888192	0.111808	0	66	1	0	2
206	-0.1371	0.915825	0.0841745	0	56	1	0	2
208	0.0641027	0.875028	0.124972	0	40	1	0	2
210	-1.09522	0.878346	0.121654	0	82	1	0	2
211	-0.0863558	0.843206	0.156794	0	86	1	0	2
220	-0.177403	0.886404	0.113596	0	45	1	0	2
222	-0.378988	0.906134	0.0938658	0	125	1	0	2
236	-0.202586	0.889066	0.110934	0	39	1	0	2
237	-0.285081	0.869525	0.130475	0	104	1	1	3
238	-0.401103	0.882945	0.117055	0	36	1	1	3
239	0.121046	0.892412	0.107588	0	55	1	1	3
240	0.0707837	0.6595	0.3405	0	48	1	1	3
246	0.551786	0.839364	0.160636	0	120	1	1	3
247	-0.156655	0.884166	0.115834	0	38	1	1	3
250	-0.676838	0.909835	0.0901646	0	101	1	1	3
255	0.169841	0.862097	0.137903	0	74	1	1	3
262	-0.133071	0.849795	0.150205	0	55	1	1	3
264	-0.820967	0.921448	0.0785517	0	88	1	1	3
265	-0.627588	0.905506	0.0944944	0	55	1	1	3
267	0.00469268	0.829609	0.170391	0	60	1	1	3
270	0.715507	0.813621	0.186379	0	91	1	1	3
271	0.639614	0.825979	0.174021	0	36	1	1	3
272	-0.152347	0.85244	0.14756	0	120	1	1	3
273	0.74721	0.76772	0.23228	0	63	1	1	3
274	2.05006	0.326751	0.673249	0	41	1	1	3
277	0.738971	0.769387	0.230613	0	36	1	1	3
280	1.46223	0.187554	0.812446	0	41	1	1	3
287	1.10741	0.736959	0.263041	0	46	1	1	3
293	0.952046	0.617711	0.382289	0	84	1	1	3
298	-0.43749	0.778488	0.221512	0	60	1	1	3
299	-0.0168736	0.682948	0.317052	0	46	1	1	3
301	1.2103	0.712981	0.287019	0	60	1	1	3
302	-0.209524	0.903444	0.0965562	0	53	1	1	3
304	0.899656	0.780387	0.219613	0	36	1	1	3
306	1.06467	0.74643	0.25357	0	48	1	1	3
60	-0.87018	0.925075	0.0749246	1	59	1	0	2
84	0.232053	0.613165	0.386835	1	16	1	0	2
89	0.116804	0.892842	0.107158	1	6	1	0	2
126	-0.548091	0.94337	0.0566299	1	57	1	0	2
158	-0.916701	0.856358	0.143642	1	12	1	0	2
160	0.823374	0.720341	0.279659	1	72	1	0	2
162	0.654718	0.785858	0.214142	1	6	1	0	2
171	-0.201415	0.902697	0.0973028	1	11	1	0	2
178	-1.23648	0.893484	0.106516	1	13	1	0	2
181	0.771305	0.73243	0.26757	1	25	1	0	2
198	-0.775344	0.954616	0.0453839	1	12	1	0	2
201	-1.00255	0.934051	0.0659492	1	13	1	0	2
202	0.239208	0.832851	0.167149	1	27	1	0	2
204	1.62829	0.598189	0.401811	1	5	1	0	2
207	-0.218311	0.922128	0.0778717	1	16	1	0	2
209	-0.0809499	0.890944	0.109056	1	4	1	0	2
212	0.135773	0.808185	0.191815	1	29	1	0	2
218	-0.82394	0.921672	0.0783279	1	11	1	0	2
223	-0.483253	0.939693	0.0603066	1	77	1	0	2
230	1.43271	0.591773	0.408227	1	18	1	0	2
231	-0.475632	0.925134	0.0748661	1	59	1	0	2
233	0.19682	0.839197	0.160803	1	6	1	0	2
234	0.875256	0.707867	0.292133	1	36	1	0	2
242	-0.982534	0.864861	0.135139	1	1	1	1	3
243	0.0215086	0.826985	0.173015	1	19	1	1	3
244	-0.142613	0.714423	0.285577	1	6	1	1	3
248	0.995285	0.677354	0.322646	1	13	1	1	3
251	-0.38525	0.768104	0.231896	1	24	1	1	3
252	1.26829	0.599387	0.400613	1	24	1	1	3
253	0.833065	0.652009	0.347991	1	17	1	1	3
258	0.247346	0.851849	0.148151	1	5	1	1	3
259	-0.395679	0.907614	0.0923863	1	36	1	1	3
260	0.290652	0.873832	0.126168	1	36	1	1	3
261	-0.592306	0.902284	0.0977165	1	84	1	1	3
263	1.57465	0.61446	0.38554	1	15	1	1	3
268	0.853934	0.402141	0.597859	1	5	1	1	3
275	0.411736	0.804655	0.195345	1	12	1	1	3
278	0.063623	0.820255	0.179745	1	52	1	1	3
282	-0.160574	0.884592	0.115408	1	39	1	1	3
283	-0.139349	0.896799	0.103201	1	13	1	1	3
284	-0.619174	0.904746	0.0952536	1	29	1	1	3
285	-0.609129	0.946632	0.0533679	1	24	1	1	3
288	1.07436	0.321229	0.678771	1	14	1	1	3
291	-0.246115	0.89353	0.10647	1	5	1	1	3
292	1.62646	0.528983	0.471017	1	10	1	1	3
295	-0.487368	0.78803	0.21197	1	36	1	1	3
296	0.262917	0.849708	0.150292	1	57	1	1	3
297	1.4284	0.593109	0.406891	1	1	1	1	3
300	1.05239	0.698612	0.301388	1	8	1	1	3
303	-1.26403	0.896223	0.103777	1	19	1	1	3
305	0.00486816	0.829582	0.170418	1	13	1	1	3

[truncated: 3 more sheets: Fig.4b, Fig.4c, Fig.4d]
